# Supplementary material for: Impact of fatigue and insufficient sleep on physician and patient outcomes: a systematic review
Source: PubMed Central journal article supplement — BMJ Open. 2018 Sep 21;8(9):e021967. doi: 10.1136/bmjopen-2018-021967 (PMC6157562; doi:10.1136/bmjopen-2018-021967), 2018-09-21

Supplementary file 5. Statistical analyses

Dichotomous outcomes

| Outcome or subgroup                      | Number of studies | Number of participants | Pooled risk ratio (95% CI) | Heterogeneity |                |
|------------------------------------------|-------------------|------------------------|----------------------------|---------------|----------------|
|                                          |                   |                        |                            | P             | I <sup>2</sup> |
| <b>1.1 Patient mortality</b>             | 5                 | 60,436                 | 0.98 (0.84, 1.15)          | 0.73          | 0%             |
| <b>1.2 Intra-operative complications</b> | 3                 | 19,798                 | suppressed                 | 0.007         | 82%            |
| 1.2.1 Surgical procedure                 | 3 <sup>a</sup>    | 14,896                 | suppressed                 | <0.001        | 88%            |
| 1.2.2 Obstetric procedure                | 1 <sup>a</sup>    | 4,902                  | suppressed                 | NA            | NA             |
| <b>1.3 Post-operative complications</b>  | 5                 | 60,201                 | 0.99 (0.95, 1.03)          | 0.45          | 0%             |

<sup>a</sup> Rothschild, 2009 is represented in both analyses

Continuous outcomes

| Outcome or subgroup                       | Number of studies | Number of participants | Pooled mean difference (95% CI) | Heterogeneity |                |
|-------------------------------------------|-------------------|------------------------|---------------------------------|---------------|----------------|
|                                           |                   |                        |                                 | P             | I <sup>2</sup> |
| <b>1.4 Operating time (minutes)</b>       | 4                 | 50,046                 | -0.14 (-1.60, 1.33)             | 0.70          | 0%             |
| <b>1.5 Length of hospital stay (days)</b> | 4                 | 50,046                 | suppressed                      | <0.001        | 86%            |
| 1.5.1 Cardiac surgeries                   | 2                 | 10,798                 | suppressed                      | 0.01          | 84%            |
| 1.5.2 Elective surgeries                  | 1                 | 38,978                 | suppressed                      | NA            | NA             |
| 1.5.3 Anterior resection for anal cancer  | 1                 | 270                    | suppressed                      | NA            | NA             |

CPBT: cardiopulmonary bypass time; NA: not applicable

1.1 Patient mortality

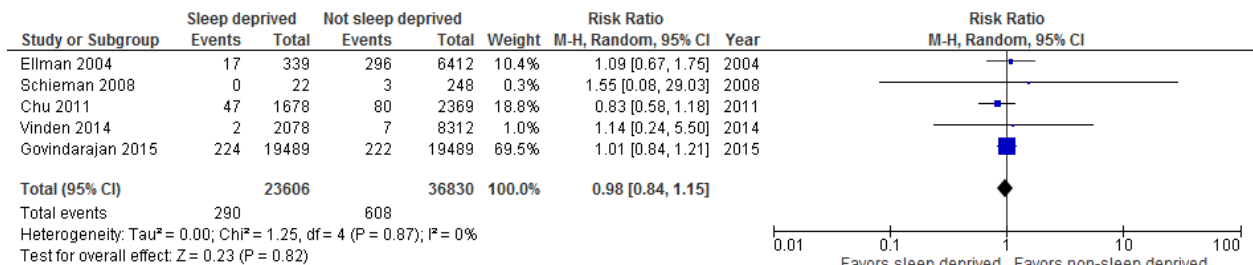

Sensitivity analysis using highest possible number of events for Vinden 2014

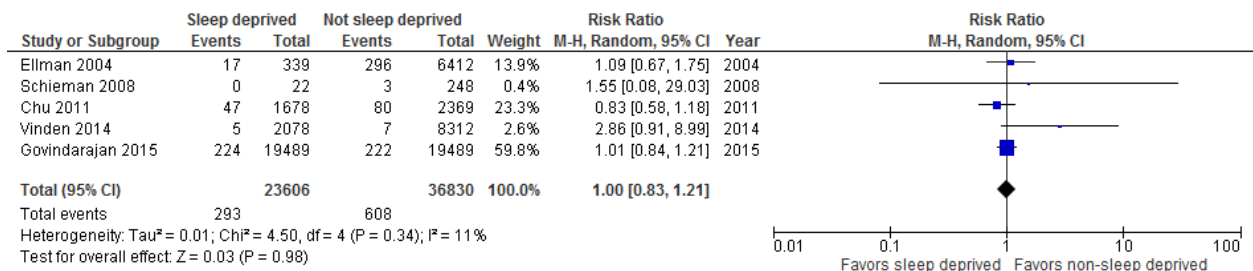

## Sensitivity analysis using lowest possible number of events for Vinden 2014

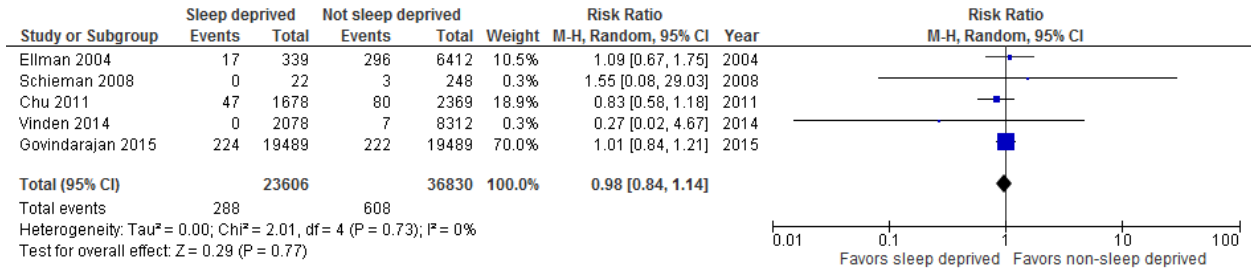

### 1.3 Post-operative complications

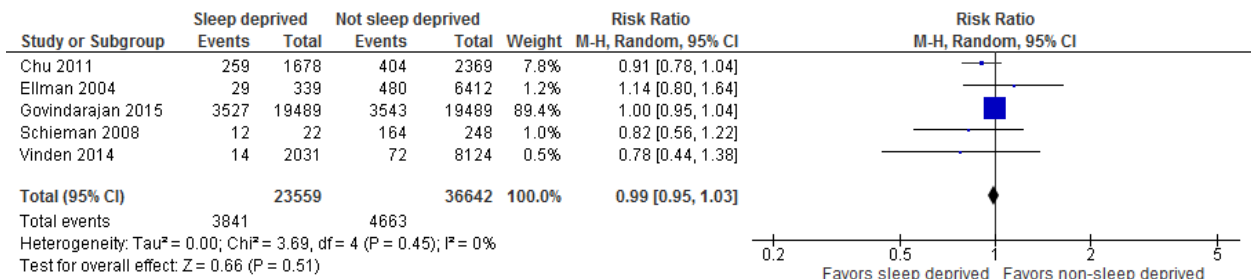

### 1.4 Operating time (minutes)

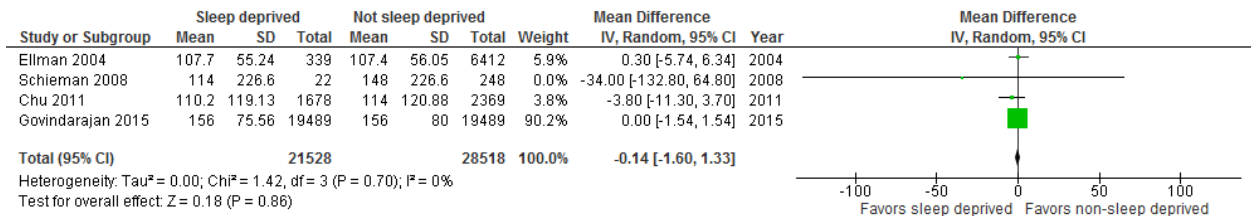

Supplement: bmjopen-2018-021967supp005.pdf [file bmjopen-2018-021967supp005.pdf]
