# Supplementary material for: Impact of fatigue and insufficient sleep on physician and patient outcomes: a systematic review
Source: PubMed Central journal article supplement — BMJ Open. 2018 Sep 21;8(9):e021967. doi: 10.1136/bmjopen-2018-021967 (PMC6157562; doi:10.1136/bmjopen-2018-021967), 2018-09-21
Supplement: bmjopen-2018-021967supp001.pdf [file bmjopen-2018-021967supp001.pdf]

## Supplementary file 1. Search Strategy

**Database:** In-Process & Other Non-Indexed Citations and Ovid MEDLINE(R) 1946 to Present

**Date searched:** 13 April 2016, updated 7 November 2017

**Records retrieved:** 5068 and 1442 in the update (removed duplicates retrieved in previous search)

1. Medical Staff, Hospital/
2. Physician Impairment/
3. exp Physicians/
4. allergist\*.ti.
5. (an?esthetist\* or an?esthesiologist\*).ti.
6. cardiologist\*.ti.
7. clinician\*.ti.
8. (clinician\* adj2 (absent\* or burn out\* or burnout\* or coping or distress\* or duty hour\* or fatigue or health\* or impair\* or resilien\* or satisfaction or sleep\* or well being\* or wellbeing\* or wellness\* or work\* hour\* or work life balance)).tw,kf.
9. (clinician\* and (cities or city or communit\* or country\* or frontier\* or north\* or remote or rural\* or suburb\* or urban\*)).tw,kf.
10. dermatologist\*.ti.
11. endocrinologist\*.ti.
12. doctor\*.ti.
13. (doctor\* adj2 (absent\* or burn out\* or burnout\* or coping or distress\* or duty hour\* or fatigue or health\* or impair\* or resilien\* or satisfaction or sleep\* or well being\* or wellbeing\* or wellness\* or work\* hour\* or work life balance)).tw,kf.
14. (doctor\* and (cities or city or communit\* or country\* or frontier\* or north\* or remote or rural\* or suburb\* or urban\*)).tw,kf.
15. family practitioner\*.ti.
16. gastroenterologist\*.ti.
17. (general practitioner\* or GP\*).ti.
18. (general adj2 physician\*).ti.
19. geriatrician\*.ti.
20. gyn?ecologist\*.ti.

21. h?ematologist\*.ti.
22. (health\* adj2 (professional\* or provider\*)).ti.
23. hospitalist\*.ti.
24. (house staff\* or housestaff\*).ti.
25. intensivist\*.ti.
26. internist\*.ti.
27. medical professional\*.ti.
28. obstetrician\*.ti.
29. oncologist\*.ti.
30. ophthalmologist\*.ti.
31. orthop?edist\*.ti.
32. (otolaryngologist\* or otorhinolaryngologist\*).ti.
33. neonatologist\*.ti.
34. nephrologist\*.ti.
35. neurologist\*.ti.
36. neuropsychiatrist\*.ti.
37. neurosurgeon\*.ti.
38. p?ediatrician\*.ti.
39. perinatologist\*.ti.
40. physician\*.ti.
41. (physician\* adj2 (absent\* or burn out\* or burnout\* or coping or distress\* or duty hour\* or fatigue or health\* or impair\* or resilien\* or satisfaction or sleep\* or well being\* or wellbeing\* or wellness\* or work\* hour\* or work life balance)).tw,kf.
42. (physician\* and (cities or city or communit\* or country\* or frontier\* or north\* or remote or rural\* or suburb\* or urban\*)).tw,kf.
43. primary care practitioner\*.ti.
44. psychiatrist\*.ti.
45. pulmonologist\*.ti.
46. rheumatologist\*.ti.
47. surgeon\*.ti.

48. (surgeon\* adj2 (absent\* or burn out\* or burnout\* or coping or distress\* or duty hour\* or fatigue or health\* or impair\* or resilien\* or satisfaction or sleep\* or well being\* or wellbeing\* or wellness\* or work\* hour\* or work life balance)).tw,kf.
49. traumatologist\*.ti.
50. urologist\*.ti.
51. or/1-50 [Combined MeSH, title, and text word searches for physicians]
52. Burnout, Professional/
53. exp Circadian Rhythm/
54. exp Fatigue/
55. Occupational Health/
56. Rest/ph, px [Physiology, Psychology]
57. Sleep Deprivation/
58. Sleep Disorders, Circadian Rhythm/
59. Sleep Wake Disorders/
60. exp Stress, Psychological/
61. Workload/px [Psychology]
62. Work Schedule Tolerance/
63. ((24 hour\* or 24 hr\* or twenty four hour\* or twentyfour hour\*) adj rhythm\*).tw,kf.
64. biological rhythm\*.tw,kf.
65. (burn out\* or burned out\* or burnt out\* or burnout\*).tw,kf.
66. circadian misalignment.tw,kf.
67. ((circadian or diurnam or ultradian) adj rhythm\*).tw,kf.
68. exhaust\*.tw,kf.
69. fatigu\*.tw,kf.
70. (sleep\* adj3 (depriv\* or disorder\* or disrupt\* or lack\* or loss or insufficien\* or problem\*)).tw,kf.
71. tired\*.tw,kf.
72. weariness.tw,kf.
73. or/52-72 [Combined MeSH and text words for fatigue]
74. and/51,73 [Combined concepts for physicians and fatigue]
75. animals/ not (animals/ and humans/)
76. 74 not 75
77. (comment or editorial or letter).pt.

78. 76 not 77

79. limit 78 to yr="2000-Current"

80. limit 79 to (english or french)

81. remove duplicates from 80

**Database: Ovid Embase 1996 to 2016 Week 15**

**Date searched:** 13 April 2016

**Records retrieved:** 8859

1. medical staff/

2. exp physician/

3. allergist\*.ti.

4. (an?esthetist\* or an?esthesiologist\*).ti.

5. cardiologist\*.ti.

6. clinician\*.ti.

7. (clinician\* adj2 (absent\* or burn out\* or burnout\* or coping or distress\* or duty hour\* or fatigue or health\* or impair\* or resilien\* or satisfaction or sleep\* or well being\* or wellbeing\* or wellness\* or work\* hour\* or work life balance)).tw.

8. (clinician\* and (cities or city or communit\* or country\* or frontier\* or north\* or remote or rural\* or suburb\* or urban\*)).tw.

9. dermatologist\*.ti.

10. endocrinologist\*.ti.

11. doctor\*.ti.

12. (doctor\* adj2 (absent\* or burn out\* or burnout\* or coping or distress\* or duty hour\* or fatigue or health\* or impair\* or resilien\* or satisfaction or sleep\* or well being\* or wellbeing\* or wellness\* or work\* hour\* or work life balance)).tw.

13. (doctor\* and (cities or city or communit\* or country\* or frontier\* or north\* or remote or rural\* or suburb\* or urban\*)).tw.

14. family practitioner\*.ti.

15. gastroenterologist\*.ti.

16. (general practitioner\* or GP\*).ti.

17. (general adj2 physician\*).ti.

18. geriatrician\*.ti.
19. gyn?ecologist\*.ti.
20. h?ematologist\*.ti.
21. (health\* adj2 (professional\* or provider\*)).ti.
22. hospitalist\*.ti.
23. (house staff\* or housestaff\*).ti.
24. intensivist\*.ti.
25. internist\*.ti.
26. medical professional\*.ti.
27. obstetrician\*.ti.
28. oncologist\*.ti.
29. ophthalmologist\*.ti.
30. orthop?edist\*.ti.
31. (otolaryngologist\* or otorhinolaryngologist\*).ti.
32. neonatologist\*.ti.
33. nephrologist\*.ti.
34. neurologist\*.ti.
35. neuropsychiatrist\*.ti.
36. neurosurgeon\*.ti.
37. p?ediatrician\*.ti.
38. perinatologist\*.ti.
39. physician\*.ti.
40. (physician\* adj2 (absent\* or burn out\* or burnout\* or coping or distress\* or duty hour\* or fatigue or health\* or impair\* or resilien\* or satisfaction or sleep\* or well being\* or wellbeing\* or wellness\* or work\* hour\* or work life balance)).tw.
41. (physician\* and (cities or city or communit\* or country\* or frontier\* or north\* or remote or rural\* or suburb\* or urban\*)).tw.
42. primary care practitioner\*.ti.
43. psychiatrist\*.ti.
44. pulmonologist\*.ti.
45. rheumatologist\*.ti.
46. surgeon\*.ti.

47. (surgeon\* adj2 (absent\* or burn out\* or burnout\* or coping or distress\* or duty hour\* or fatigue or health\* or impair\* or resilien\* or satisfaction or sleep\* or well being\* or wellbeing\* or wellness\* or work\* hour\* or work life balance)).tw.
48. traumatologist\*.ti.
49. urologist\*.ti.
50. or/1-49 [Combined Emtree, title, and text word searches for physicians]
51. burnout/
52. circadian rhythm/
53. circadian rhythm sleep disorder/
54. fatigue/
55. mental stress/
56. occupational health/
57. sleep deprivation/
58. sleep waking cycle/
59. work capacity/
60. work schedule/
61. working time/
62. workload/
63. ((24 hour\* or 24 hr\* or twenty four hour\* or twentyfour hour\*) adj rhythm\*).tw.
64. biological rhythm\*.tw.
65. (burn out\* or burned out\* or burnt out\* or burnout\*).tw.
66. circadian misalignment.tw.
67. ((circadian or diurnam or ultradian) adj rhythm\*).tw.
68. exhaust\*.tw.
69. fatigu\*.tw.
70. (sleep\* adj3 (depriv\* or disorder\* or disrupt\* or lack\* or loss or insufficien\* or problem\*)).tw.
71. tired\*.tw.
72. weariness.tw.
73. or/51-72 [Combined Emtree and text words for fatigue]
74. and/50,73 [Combined concepts for physicians and fatigue]
75. animals/ not (animals/ and humans/)
76. 74 not 75

77. (conference\* or editorial or letter or proceeding).pt.

78. 76 not 77

79. limit 78 to yr="2000-Current"

80. limit 79 to (english or french)

81. limit 80 to embase

**Database: Ovid PsycINFO 1987 to April Week 1 2016**

**Date searched: 13 April 2016**

**Records retrieved: 2094**

1. exp Physicians/

2. allergist\*.ti.

3. (an?esthetist\* or an?esthesiologist\*).ti.

4. cardiologist\*.ti.

5. clinician\*.ti.

6. (clinician\* adj2 (absent\* or burn out\* or burnout\* or coping or distress\* or duty hour\* or fatigue or health\* or impair\* or resilien\* or satisfaction or sleep\* or well being\* or wellbeing\* or wellness\* or work\* hour\* or work life balance)).tw.

7. (clinician\* and (cities or city or communit\* or country\* or frontier\* or north\* or remote or rural\* or suburb\* or urban\*)).tw.

8. dermatologist\*.ti.

9. endocrinologist\*.ti.

10. doctor\*.ti.

11. (doctor\* adj2 (absent\* or burn out\* or burnout\* or coping or distress\* or duty hour\* or fatigue or health\* or impair\* or resilien\* or satisfaction or sleep\* or well being\* or wellbeing\* or wellness\* or work\* hour\* or work life balance)).tw.

12. (doctor\* and (cities or city or communit\* or country\* or frontier\* or north\* or remote or rural\* or suburb\* or urban\*)).tw.

13. family practitioner\*.ti.

14. gastroenterologist\*.ti.

15. (general practitioner\* or GP\*).ti.

16. (general adj2 physician\*).ti.

17. geriatrician\*.ti.
18. gyn?ecologist\*.ti.
19. h?ematologist\*.ti.
20. (health\* adj2 (professional\* or provider\*)).ti.
21. hospitalist\*.ti.
22. intensivist\*.ti.
23. internist\*.ti.
24. medical professional\*.ti.
25. obstetrician\*.ti.
26. oncologist\*.ti.
27. ophthalmologist\*.ti.
28. orthop?edist\*.ti.
29. (otolaryngologist\* or otorhinolaryngologist\*).ti.
30. neonatologist\*.ti.
31. nephrologist\*.ti.
32. neurologist\*.ti.
33. neuropsychiatrist\*.ti.
34. neurosurgeon\*.ti.
35. p?ediatrician\*.ti.
36. perinatologist\*.ti.
37. physician\*.ti.
38. (physician\* adj2 (absent\* or burn out\* or burnout\* or coping or distress\* or duty hour\* or fatigue or health\* or impair\* or resilien\* or satisfaction or sleep\* or well being\* or wellbeing\* or wellness\* or work\* hour\* or work life balance)).tw.
39. (physician\* and (cities or city or communit\* or country\* or frontier\* or north\* or remote or rural\* or suburb\* or urban\*)).tw.
40. primary care practitioner\*.ti.
41. psychiatrist\*.ti.
42. pulmonologist\*.ti.
43. rheumatologist\*.ti.
44. surgeon\*.ti.



45. (surgeon\* adj2 (absent\* or burn out\* or burnout\* or coping or distress\* or duty hour\* or fatigue or health\* or impair\* or resilien\* or satisfaction or sleep\* or well being\* or wellbeing\* or wellness\* or work\* hour\* or work life balance)).tw.
46. traumatologist\*.ti.
47. urologist\*.ti.
48. or/1-47 [Combined thesaurus, title, and text word searches for physicians]
49. Compassion Fatigue/
50. Fatigue/
51. Human Biological Rhythms/
52. Occupational Health/
53. Occupational Stress/
54. Sleep/
55. Sleepiness/
56. Working Conditions/
57. Work Rest Cycles/
58. Work Week Length/
59. Work Scheduling/
60. Workday Shifts/
61. ((24 hour\* or 24 hr\* or twenty four hour\* or twentyfour hour\*) adj rhythm\*).tw.
62. biological rhythm\*.tw.
63. (burn out\* or burned out\* or burnt out\* or burnout\*).tw.
64. circadian misalignment.tw.
65. ((circadian or diurnam or ultradian) adj rhythm\*).tw.
66. exhaust\*.tw.
67. fatigu\*.tw.
68. (sleep\* adj3 (depriv\* or disorder\* or disrupt\* or lack\* or loss or insufficien\* or problem\*)).tw.
69. tired\*.tw.
70. weariness.tw.
71. or/49-70 [Combined thesaurus and text words for fatigue]
72. and/48,71 [Combined concepts for physicians and fatigue]
73. limit 72 to yr="2000-Current"
74. limit 73 to (english or french)

**Database: CINAHL Plus with Full Text (1937 to the present) via EBSCOhost**

**Date searched:** 14 April 2016

**Records retrieved:** 3378

S1. (MH "Medical Staff, Hospital+")

S2. (MH "Physicians+")

S3. TI allertist\*

S4. TI (anesthetist\* or anaesthetist\* or anesthesiologist\* or anaesthesiologist\*)

S5. TI cardiologist\*

S6. TI clinician\*

S7. clinician\* N2 (absent\* or "burn out\*" or burnout\* or coping or distress\* or "duty hour\*" or fatigue or health\* or impair\* or resilien\* or satisfaction or sleep\* or "well being\*" or wellbeing\* or wellness\* or "work\* hour\*" or "work life balance")

S8. clinician\* and (cities or city or communit\* or country\* or frontier\* or north\* or remote or rural\* or suburb\* or urban\*)

S9. TI dermatologist\*

S10. TI endocrinologist\*

S11. TI doctor\*

S12. doctor\* N2 (absent\* or "burn out\*" or burnout\* or coping or distress\* or "duty hour\*" or fatigue or health\* or impair\* or resilien\* or satisfaction or sleep\* or "well being\*" or wellbeing\* or wellness\* or work\* hour\* or "work life balance")

S13. doctor\* and (cities or city or communit\* or country\* or frontier\* or north\* or remote or rural\* or suburb\* or urban\*)

S14. TI "family practitioner\*"

S15. TI gastroenterologist\*

S16. TI ("general practitioner\*" or GP\*)

S17. TI (general N2 physician\*)

S18. TI geriatrician\*

S19. TI (gynaecologist\* or gynecologist\*)

S20. TI (haematologist\* or hematologist\*)

S21. TI hospitalist\*

S22. TI ("house staff\*" or housestaff\*)

S23. TI intensivist\*

S24. TI internist\*

S25. TI obstetrician\*

S26. TI oncologist\*

S27. TI ophthalmologist\*

S28. TI (orthopaedist\* or orthopedist\*)

S29. TI (otolaryngologist\* or otorhinolaryngologist\*)

S30. TI neonatologist\*

S31. TI nephrologist\*

S32. TI neurologist\*

S33. TI neuropsychiatrist\*

S34. TI neurosurgeon\*

S35. TI (paediatrician\* OR pediatrician\*)

S36. TI perinatologist\*

S37. TI physician\*

S38. physician\* N2 (absent\* or "burn out\*" or burnout\* or coping or distress\* or "duty hour\*" or fatigue or health\* or impair\* or resilien\* or satisfaction or sleep\* or "well being\*" or wellbeing\* or wellness\* or "work\* hour\*" or "work life balance")

S39. physician\* and (cities or city or communit\* or country\* or frontier\* or north\* or remote or rural\* or suburb\* or urban\*)

S40. TI "primary care practitioner\*"

S41. TI psychiatrist\*

S42. TI pulmonologist\*

S43. TI rheumatologist\*

S44. TI surgeon\*

S45. surgeon\* N2 (absent\* or "burn out\*" or burnout\* or coping or distress\* or "duty hour\*" or fatigue or health\* or impair\* or resilien\* or satisfaction or sleep\* or "well being\*" or wellbeing\* or wellness\* or work\* hour\* or "work life balance")

S46. TI traumatologist\*

S47. TI urologist\*

S48. S1 OR S2 OR S3 OR S4 OR S5 OR S6 OR S7 OR S8 OR S9 OR S10 OR S11 OR S12 OR S13 OR S14 OR S15 OR S16 OR S17 OR S18 OR S19 OR S20 OR S21 OR S22 OR S23 OR S24 OR S25 OR S26 OR S27 OR S28

OR S29 OR S30 OR S31 OR S32 OR S33 OR S34 OR S35 OR S36 OR S37 OR S38 OR S39 OR S40 OR S41 OR  
S42 OR S43 OR S44 OR S45 OR S46 OR S47

S49. (MH "Circadian Rhythm")

S50. (MH "Fatigue")

S51. (MH "Impairment, Health Professional")

S52. (MH "Mental Fatigue")

S53. (MH "Occupational Health")

S54. (MH "Shiftwork")

S55. (MH "Sleep Deprivation")

S56. (MH "Sleep Disorders, Circadian Rhythm")

S57. (MH "Sleep-Wake Transition Disorders")

S58. (MH "Stress, Occupational+")

S59. (MH "Stress, Psychological")

S60. ("24 hour\*" or "24 hr\*" or "twenty four hour\*" or "twentyfour hour\*") N1 rhythm\*

S61. "biological rhythm\*"

S62. "burn out\*" or "burned out\*" or "burnt out\*" or burnout\*

S63. "circadian misalignment"

S64. (circadian or diurnal or ultradian) N1 rhythm\*

S65. exhaust\*

S66. fatigu\*

S67. sleep\* N3 (depriv\* or disorder\* or disrupt\* or lack\* or loss or insufficien\* or problem\*)

S68. tired\*

S69. weariness

S70. S49 OR S50 OR S51 OR S52 OR S53 OR S54 OR S55 OR S56 OR S57 OR S58 OR S59 OR S60 OR S61 OR  
S62 OR S63 OR S64 OR S65 OR S66 OR S67 OR S68 OR S69

S71. S48 AND S70

S72. S48 AND S70 Limiters - Published Date: 20000101-20161231; Publication Type: Clinical Trial, Journal  
Article, Meta Analysis, Meta Synthesis, Practice Guidelines, Randomized Controlled Trial, Research,  
Review, Systematic Review; Language: English, French

**Database: PubMed via NCBI Entrez**

**Date searched:** 14 April 2016

**Records retrieved:** 92

((("Medical Staff, Hospital"[mh:noexp] OR "Physician Impairment"[mh:noexp] OR "Physicians"[mh] OR allergist[ti] OR allergists[ti] OR anaesthetist[ti] OR anaesthetists[ti] OR anaesthesiologist[ti] OR anaesthesiologists[ti] OR anesthetist[ti] OR anesthetists[ti] OR anesthesiologist[ti] OR anesthesiologists[ti] OR cardiologist[ti] OR cardiologists[ti] OR clinician[ti] OR clinicians[ti] OR ((clinician[tiab] OR clinicians[tiab]) AND (absent[tiab] OR absentee[tiab] OR absenteeism[tiab] OR absenteeisms[tiab] OR "burned out"[tiab] OR "burn out"[tiab] OR "burn outs"[tiab] OR burnout[tiab] OR burnouts[tiab] OR "burnt out"[tiab] OR coping[tiab] OR distress[tiab] OR distressed[tiab] OR distresses[tiab] OR distressing[tiab] OR "duty hour"[tiab] OR "duty hours"[tiab] OR fatigue[tiab] OR fatigued[tiab] OR fatigues[tiab] OR fatiguing[tiab] OR health[tiab] OR healthy[tiab] OR impair[tiab] OR impaired[tiab] OR impairment[tiab] OR resilience[tiab] OR resiliency[tiab] OR resilient[tiab] OR satisfaction[tiab] OR sleep[tiab] OR sleepiness[tiab] OR sleeps[tiab] OR "well being"[tiab] OR wellbeing[tiab] OR wellness[tiab] OR "work hours"[tiab] OR "working hours"[tiab] OR "work life balance"[tiab])) OR ((clinician[tiab] OR clinicians[tiab]) AND (cities[tiab] OR city[tiab] OR community[tiab] OR communities[tiab] OR country[tiab] OR countryside[tiab] OR frontier[tiab] OR north[tiab] OR northern[tiab] OR remote[tiab] OR rural[tiab] OR suburb[tiab] OR suburbs[tiab] OR suburban[tiab] OR urban[tiab] OR urbanite[tiab])) OR dermatologist[ti] OR dermatologists[ti] OR endocrinologist[ti] OR endocrinologists[ti] OR doctor[ti] OR doctors[ti] OR ((doctor[tiab] OR doctors[tiab]) AND (absent[tiab] OR absentee[tiab] OR absenteeism[tiab] OR absenteeisms[tiab] OR "burned out"[tiab] OR "burn out"[tiab] OR "burn outs"[tiab] OR burnout[tiab] OR burnouts[tiab] OR "burnt out"[tiab] OR coping[tiab] OR distress[tiab] OR distressed[tiab] OR distresses[tiab] OR distressing[tiab] OR "duty hour"[tiab] OR "duty hours"[tiab] OR fatigue[tiab] OR fatigued[tiab] OR fatigues[tiab] OR fatiguing[tiab] OR health[tiab] OR healthy[tiab] OR impair[tiab] OR impaired[tiab] OR impairment[tiab] OR resilience[tiab] OR resiliency[tiab] OR resilient[tiab] OR satisfaction[tiab] OR sleep[tiab] OR sleepiness[tiab] OR sleeps[tiab] OR "well being"[tiab] OR wellbeing[tiab] OR wellness[tiab] OR "work hours"[tiab] OR "working hours"[tiab] OR "work life balance"[tiab])) OR ((doctor[tiab] OR doctors[tiab]) AND (cities[tiab] OR city[tiab] OR community[tiab] OR communities[tiab] OR country[tiab] OR countryside[tiab] OR frontier[tiab] OR north[tiab] OR northern[tiab] OR remote[tiab] OR rural[tiab] OR suburb[tiab] OR suburbs[tiab] OR suburban[tiab] OR urban[tiab] OR urbanite[tiab])) OR "family practitioner"[ti] OR

"family practitioners"[ti] OR gastroenterologist[ti] OR gastroenterologists[ti] OR "general practice physician"[ti] OR "general practice physicians"[ti] OR "general practitioner"[ti] OR "general practitioners"[ti] OR geriatrician[ti] OR geriatricians[ti] OR gynaecologist[ti] OR gynaecologists[ti] OR gynecologist[ti] OR gynecologists[ti] OR haematologist[ti] OR haematologists[ti] OR hematologist[ti] OR hematologists[ti] OR "health care professional"[ti] OR "health care professionals"[ti] AND "health care provider"[ti] OR "health care providers" OR "health professional"[ti] OR "health professionals"[ti] OR "health provider"[ti] OR "health providers"[ti] OR "healthcare professional"[ti] OR "healthcare professionals"[ti] OR "healthcare provider"[ti] OR "healthcare providers"[ti] OR hospitalist[ti] OR hospitalists[ti] OR "house staff"[ti] OR "house staffs"[ti] OR housestaff[ti] OR housestaffs[ti] OR intensivivist[ti] OR intensivivists[ti] OR internist[ti] OR internists[ti] OR "medical professional"[ti] OR "medical professionals"[ti] OR obstetrician[ti] OR obstetricians[ti] OR oncologist[ti] OR oncologists[ti] OR ophthalmologist[ti] OR ophthalmologists[ti] OR orthopaedist[ti] OR orthopaedists[ti] OR orthopedist[ti] OR orthopedists[ti] OR otolaryngologist[ti] OR otolaryngologists[ti] OR otorhinolaryngologist[ti] OR otorhinolaryngologists[ti] OR neonatologist[ti] OR neonatologists[ti] OR nephrologist[ti] OR nephrologists[ti] OR neurologist[ti] OR neurologists[ti] OR neuropsychiatrist[ti] OR neuropsychiatrists[ti] OR neurosurgeon[ti] OR neurosurgeons[ti] OR paediatrician[ti] OR paediatricians[ti] OR pediatrician[ti] OR pediatricians[ti] OR perinatologist[ti] OR perinatologists[ti] OR physician[ti] OR physicians[ti] OR ((physician[tiab] OR physicians[tiab]) AND (absent[tiab] OR absentee[tiab] OR absenteeism[tiab] OR absenteeisms[tiab] OR "burned out"[tiab] OR "burn out"[tiab] OR "burn outs"[tiab] OR burnout[tiab] OR burnouts[tiab] OR "burnt out"[tiab] OR coping[tiab] OR distress[tiab] OR distressed[tiab] OR distresses[tiab] OR distressing[tiab] OR "duty hour"[tiab] OR "duty hours"[tiab] OR fatigue[tiab] OR fatigued[tiab] OR fatigues[tiab] OR fatiguing[tiab] OR health[tiab] OR healthy[tiab] OR impair[tiab] OR impaired[tiab] OR impairment[tiab] OR resilience[tiab] OR resiliency[tiab] OR resilient[tiab] OR satisfaction[tiab] OR sleep[tiab] OR sleepiness[tiab] OR sleeps[tiab] OR "well being"[tiab] OR wellbeing[tiab] OR wellness[tiab] OR "work hours"[tiab] OR "working hours"[tiab] OR "work life balance"[tiab])) OR ((physician[tiab] OR physicians[tiab]) AND (cities[tiab] OR city[tiab] OR community[tiab] OR communities[tiab] OR country[tiab] OR countryside[tiab] OR frontier[tiab] OR north[tiab] OR northern[tiab] OR remote[tiab] OR rural[tiab] OR suburb[tiab] OR suburbs[tiab] OR suburban[tiab] OR urban[tiab] OR urbanite[tiab])) OR "primary care practitioner"[ti] OR "primary care practitioners"[ti] OR psychiatrist[ti] OR psychiatrists[ti] OR pulmonologist[ti] OR pulmonologists[ti] OR rheumatologist[ti] OR rheumatologists[ti] OR surgeon[ti] OR surgeons[ti] OR ((surgeon[tiab] OR surgeons[tiab]) AND (absent[tiab] OR absentee[tiab] OR absenteeism[tiab] OR absenteeisms[tiab] OR

"burned out"[tiab] OR "burn out"[tiab] OR "burn outs"[tiab] OR burnout[tiab] OR burnouts[tiab] OR "burnt out"[tiab] OR coping[tiab] OR distress[tiab] OR distressed[tiab] OR distresses[tiab] OR distressing[tiab] OR "duty hour"[tiab] OR "duty hours"[tiab] OR fatigue[tiab] OR fatigued[tiab] OR fatigues[tiab] OR fatiguing[tiab] OR health[tiab] OR healthy[tiab] OR impair[tiab] OR impaired[tiab] OR impairment[tiab] OR resilience[tiab] OR resiliency[tiab] OR resilient[tiab] OR satisfaction[tiab] OR sleep[tiab] OR sleepiness[tiab] OR sleeps[tiab] OR "well being"[tiab] OR wellbeing[tiab] OR wellness[tiab] OR "work hours"[tiab] OR "working hours"[tiab] OR "work life balance"[tiab])) OR traumatologist[ti] OR traumatologists[ti] OR urologist[ti] OR urologists[ti] AND ("Burnout, Professional"[mh:noexp] OR "Circadian Rhythm"[mh] OR "Fatigue"[mh] OR "Occupational Health"[mh:noexp] OR "Rest/physiology"[mh:noexp] OR "Rest/psychology"[mh:noexp] OR "Sleep Deprivation"[mh:noexp] OR "Sleep Disorders, Circadian Rhythm"[mh:noexp] OR "Stress, Psychological"[mh] OR "Workload/psychology"[mh] OR "Work Schedule Tolerance"[mh:noexp] OR "24 hour rhythm"[tiab] OR "24 hour rhythms"[tiab] OR "24 hr rhythm"[tiab] OR "24 hr rhythms"[tiab] OR alertness[tiab] OR "biological rhythm"[tiab] OR "biological rhythms"[tiab] OR "burn out"[tiab] OR "burned out"[tiab] OR "burnt out"[tiab] OR burnout[tiab] OR "circadian misalignment"[tiab] OR "circadian rhythm"[tiab] OR "circadian rhythms"[tiab] OR "diurnal rhythm"[tiab] OR "diurnal rhythms"[tiab] OR exhausted[tiab] OR exhaustion[tiab] OR exhausting[tiab] OR exhausts[tiab] OR fatigue[tiab] OR fatigued[tiab] OR fatigues[tiab] OR fatiguing[tiab] OR ("Sleep"[mh:noexp] OR sleep[tiab] OR sleeping[tiab]) AND (deprivation[tiab] OR deprive[tiab] OR deprived[tiab] OR deprives[tiab] OR depriving[tiab] OR disorder[tiab] OR disorders[tiab] OR lack[tiab] OR lacked[tiab] OR lacking[tiab] OR lacks[tiab] OR loss[tiab] AND insufficient[tiab] OR problem[tiab] OR problems[tiab])) OR tired[tiab] OR tiredness[tiab] OR "twenty four hour rhythm"[tiab] OR "twenty four hour rhythms"[tiab] OR weariness[tiab] OR "ultradian rhythm"[tiab] OR "ultradian rhythms"[tiab])) NOT (((Animals[MESH] OR Animal Experimentation[MESH] OR "Models, Animal"[MESH] OR Vertebrates[MESH]) NOT (Humans[MESH] OR Human experimentation[MESH])) OR (((animals[tiab] OR animal model[tiab] OR rat[tiab] OR rats[tiab] OR mouse[tiab] OR mice[tiab] OR rabbit[tiab] OR rabbits[tiab] OR pig[tiab] OR pigs[tiab] OR porcine[tiab] OR swine[tiab] OR dog[tiab] OR dogs[tiab] OR hamster[tiab] OR hamsters[tiab] OR chicken[tiab] OR chickens[tiab] OR sheep[tiab]) AND (publisher[ti] OR inprocess[ti] OR pubmednotmedline[ti])) NOT (human[ti] OR humans[ti] OR people[ti] OR children[ti] OR adults[ti] OR seniors[ti] OR patient[ti] OR patients[ti]))) NOT (editorial[pt] OR comment[pt] OR letter[pt] OR newspaper article[pt])) AND ((publisher[ti] NOT pubstatusnihms NOT pubstatuspmcsd NOT pmcbook) OR (pubstatUSheadofprint))

Filters activated: Publication date from 2000/01/01 to 2016/12/31, English, French.
