# Supplementary material for: Impact of fatigue and insufficient sleep on physician and patient outcomes: a systematic review
Source: PubMed Central journal article supplement — BMJ Open. 2018 Sep 21;8(9):e021967. doi: 10.1136/bmjopen-2018-021967 (PMC6157562; doi:10.1136/bmjopen-2018-021967), 2018-09-21
Supplement: bmjopen-2018-021967supp002.pdf [file bmjopen-2018-021967supp002.pdf]

**Supplementary table 1.** Descriptive characteristics of the included studies

| Study<br>Country                               | Physician and patient characteristics                                             |                                     |                                                                         |                                                                                                                           | Setting                                                                       |                      | Interventions or<br>exposures                                            | Outcomes                                                                                                 |
|------------------------------------------------|-----------------------------------------------------------------------------------|-------------------------------------|-------------------------------------------------------------------------|---------------------------------------------------------------------------------------------------------------------------|-------------------------------------------------------------------------------|----------------------|--------------------------------------------------------------------------|----------------------------------------------------------------------------------------------------------|
|                                                | Type                                                                              | n=                                  | Sex (% male)                                                            | Age                                                                                                                       | Location                                                                      | Urban<br>or<br>rural |                                                                          |                                                                                                          |
| <b>Observational (exposure) studies (n=45)</b> |                                                                                   |                                     |                                                                         |                                                                                                                           |                                                                               |                      |                                                                          |                                                                                                          |
| <b>Cohort design</b>                           |                                                                                   |                                     |                                                                         |                                                                                                                           |                                                                               |                      |                                                                          |                                                                                                          |
| Chu, 2011 [32]<br>Canada                       | Surgeons<br>Patients: cardiac surgery cases                                       | 6<br>4,047                          | NR<br>NR                                                                | Range: 32-55y<br>NR                                                                                                       | Tertiary care academic<br>hospital                                            | Urban                | Insufficient sleep due to work on the night preceding surgery            | Length of surgery; patient postoperative mortality, complications, length of stay                        |
| Ellman, 2004 [41]<br>US                        | Surgeons<br>Patients: adult cardiac surgery cases                                 | NR<br>6,751                         | NR<br>70%                                                               | NR<br>S: 63.4±0.7y<br>C: 63.5±0.1y                                                                                        | University hospitals                                                          | Urban                | Insufficient sleep due to work on the night preceding surgery            | Length of surgery; patient complications, in-hospital mortality, length of stay, need for blood products |
| Govindarajan, 2015 [31]<br>Canada              | Surgeons<br>Patients: surgical cases                                              | 1,448<br>38,978                     | NR<br>NR                                                                | 46.3±8.7<br>56.4±16.6y                                                                                                    | Academic and non-academic hospitals                                           | Mixed                | Sleep deprivation due to work on the night preceding a daytime surgery   | Length of surgery; Patient complications, mortality, readmissions, length of stay                        |
| Rothschild, 2009 [58]<br>US                    | Surgeons<br>Obstetrician/gynecologists<br>Patients: surgical and obstetrics cases | 220<br>Surg.: 4,471<br>Obst.: 4,902 | Surgeons: 84%<br>OB/GYNs: 28%<br>Surg.: C: 28%<br>Obst.: S: 0%<br>C: 0% | Surgeons: 42.0±7.6y<br>OB/GYNs: 42.0±9.0y<br>Surg.: S: 49.1±16.3y<br>C: 50.0±16.3y<br>Obst.: S: 32.9±5.2y<br>C: 33.5±5.0y | Tertiary care academic trauma centre/referral centre for high-risk obstetrics | Urban                | Sleep deprivation due to work on the night preceding a daytime procedure | Patient complications, preventable complications                                                         |
| Schieman, 2007 [63]<br>Canada                  | Colorectal surgeons<br>Patients: undergoing anterior resection for rectal cancer  | NR<br>270                           | NR<br>NR                                                                | NR<br>S: 64.5y<br>C: 64.4y                                                                                                | University teaching hospitals                                                 | NR                   | Fatigue due to work on the night preceding surgery                       | Length of surgery; patient operative complications, length of stay, mortality, cancer recurrence         |

| Study<br>Country                     | Physician and patient characteristics                       |               |                         |                                                       | Setting                                                                         |                      | Interventions or<br>exposures                                              | Outcomes                                                                         |
|--------------------------------------|-------------------------------------------------------------|---------------|-------------------------|-------------------------------------------------------|---------------------------------------------------------------------------------|----------------------|----------------------------------------------------------------------------|----------------------------------------------------------------------------------|
|                                      | Type                                                        | n=            | Sex (% male)            | Age                                                   | Location                                                                        | Urban<br>or<br>rural |                                                                            |                                                                                  |
| Vinden, 2014 [77]<br>Canada          | General surgeons<br>Patients: Elective<br>cholecystectomies | 331<br>10,390 | 83%<br>S: 27%<br>C: 26% | 48±10y<br>S: 49±16y<br>C: 49±16y                      | Community hospitals                                                             | Mixed                | Sleep deprivation due<br>to overnight work<br>preceding daytime<br>surgery | Patient mortality,<br>operative complications                                    |
| <b>Before-after design</b>           |                                                             |               |                         |                                                       |                                                                                 |                      |                                                                            |                                                                                  |
| Amirian, 2014 [34]<br>Denmark        | Surgeons                                                    | 29            | 55%                     | Median: 35y<br>Range: 27-49y                          | Academic hospital                                                               | Urban                | 17-h night shift with<br>sleep deprivation                                 | Cognitive and<br>psychomotor abilities on<br>a laparoscopic simulation           |
| Gerdes, 2008 [45]<br>US              | Surgeons                                                    | 9             | NR                      | NR                                                    | University Hospital                                                             | Urban                | Fatigue; sleep<br>deprivation from<br>overnight call shift                 | Cognitive and<br>psychomotor abilities                                           |
| Lederer, 2006 [50]<br>Austria        | Senior anesthetists                                         | 11            | 82%                     | 49.0±2.0y                                             | Hospital                                                                        | Urban                | Sleep deprivation<br>from 24-h call shift                                  | Concentration ability;<br>reaction time;<br>performance on<br>psychometric tasks |
| <b>Time series design</b>            |                                                             |               |                         |                                                       |                                                                                 |                      |                                                                            |                                                                                  |
| Leichtfried, 2011<br>[51]<br>Austria | Anesthetists                                                | 10            | 100%                    | Mean: 32y<br>Range: 29-35y                            | University Hospital                                                             | Urban                | Sleep deprivation<br>from 24-h shift;<br>sleepiness, sleep<br>hours        | Melatonin metabolite<br>profile                                                  |
| <b>Cross-sectional design</b>        |                                                             |               |                         |                                                       |                                                                                 |                      |                                                                            |                                                                                  |
| Aziz, 2004 [35]<br>US                | Family medicine physicians<br>Various specialties           | 153           | NR                      | NR                                                    | Hospitals                                                                       | NR                   | Fatigue                                                                    | Stress                                                                           |
| Beaujouan, 2005<br>[36]<br>France    | Anesthesiologists                                           | 3,476         | 64%                     | ≤35y: 9%<br>36-45y: 28%<br>46-55y: 49%<br>56-65y: 13% | Public sector<br>General hospitals<br>University hospitals<br>Private hospitals | NR                   | Sleep deprivation                                                          | Substance abuse                                                                  |
| Chang, 2013 [37]<br>US               | Anesthesiologists                                           | 11            | 64%                     | Mean: 38y<br>IQR: 34-48y                              | Level 1 trauma centre                                                           | NR                   | Sleep deprivation due<br>to 15-h overnight call<br>shift; sleepiness       | Cognitive performance;<br>reaction time                                          |

| Study<br>Country                   | Physician and patient characteristics                                                                                                    |       |              | Setting                                                       |                                                                                             | Interventions or<br>exposures | Outcomes                                    |                                                                          |
|------------------------------------|------------------------------------------------------------------------------------------------------------------------------------------|-------|--------------|---------------------------------------------------------------|---------------------------------------------------------------------------------------------|-------------------------------|---------------------------------------------|--------------------------------------------------------------------------|
|                                    | Type                                                                                                                                     | n=    | Sex (% male) | Age                                                           | Location                                                                                    |                               |                                             | Urban<br>or<br>rural                                                     |
| Chen, 2008 [38]<br>US              | Psychiatrists<br>Internists<br>General practitioners<br>Surgeons<br>Obstetrician-gynecologists<br>Radiologists<br>Pediatricians<br>Other | 180   | 77%          | Academic:<br>79% 36-55y<br>Private<br>practice:<br>73% 36-65y | Medical school<br>Private practices                                                         | Urban                         | Sleep deprivation;<br>sleepiness            | Impact on personal and<br>professional life;<br>perceived risk of errors |
| Doppia, 2011 [39]<br>France        | Anesthesiologists                                                                                                                        | 565   | 64%          | <35y: 11%<br>35-54y: 63%<br>>55y: 25%                         | Public hospitals<br>Private hospitals<br>Work-health<br>environments<br>Public health units | NR                            | Sleep deprivation                           | Burnout                                                                  |
| Elovaino, 2015<br>[42]<br>Finland  | Physicians in various<br>specialties                                                                                                     | 1,524 | 40%          | Median: 49.7y<br>Range: 24-69y                                | Hospitals<br>Primary care<br>Private practice<br>Other unspecified                          | NR                            | Sleep difficulties                          | Job demands and control                                                  |
| Gander, 2000 [43]<br>New Zealand   | Anesthetists                                                                                                                             | 183   | NR           | Mean: 46y                                                     | Combined<br>public/private practice<br>Other unspecified                                    | NR                            | Work-related sleep<br>disturbance           | Risk of fatigue-related<br>errors                                        |
| Harbeck, 2015 [46]<br>Germany      | Internists                                                                                                                               | 20    | 45%          | Median: 32y<br>Range: 26-42y                                  | Hospital                                                                                    | NR                            | Sleep disturbance due<br>to a 24-call shift | Biochemical and<br>physiological parameters;<br>neurocognitive function  |
| Heponiemi, 2014<br>[47]<br>Finland | Physicians in various<br>specialties<br>Non-specialized physicians                                                                       | 1,541 | 40%          | 49.80±9.49y,<br>Range: 24-67y                                 | Hospitals<br>Primary care clinic<br>Private practice<br>Other unspecified                   | NR                            | Sleep difficulties                          | Job satisfaction; work<br>ability; psychological<br>distress             |

| Study<br>Country                | Physician and patient characteristics                                                                                                                                                        |                             |              | Setting                                                                                                        |                                                                             | Interventions or<br>exposures | Outcomes                                                             |
|---------------------------------|----------------------------------------------------------------------------------------------------------------------------------------------------------------------------------------------|-----------------------------|--------------|----------------------------------------------------------------------------------------------------------------|-----------------------------------------------------------------------------|-------------------------------|----------------------------------------------------------------------|
|                                 | Type                                                                                                                                                                                         | n=                          | Sex (% male) | Age                                                                                                            | Location                                                                    |                               |                                                                      |
| Jackson, 2017 [48]<br>US        | Surgeons in various<br>subspecialties                                                                                                                                                        | 993                         | 61%          | More; less<br>satisfied:<br>30-39y:<br>23%;24%<br>40-49y:<br>32%;36%<br>50-59y:<br>23%;27%<br>≥60y:<br>23%;14% | Academic practice<br>Non-academic practice                                  | NR                            | Not feeling well rested<br>Job satisfaction                          |
| Kanieta, 2011 [49]<br>Japan     | Internists<br>Surgeons<br>Orthopedics<br>Pediatricians<br>Obstetrician-gynecologists<br>Psychiatrists<br>Dermatologists<br>Urologists<br>Ophthalmologists<br>Otorhinolaryngologists<br>Other | 3,486                       | 66%          | 20-39y: 11%<br>40-49y: 25%<br>50-59y: 28%<br>60-69y: 16%<br>≥70y: 21%                                          | Hospitals<br>Clinics<br>Other unspecified                                   | NR                            | Sleep deprivation and<br>difficulties; insomnia<br>Medical incidents |
| Lindfors, 2006 [52]<br>Finland  | Anesthetists                                                                                                                                                                                 | 328                         | 53%          | 47±7.8y<br>Range: 32-69y                                                                                       | University hospitals<br>Central and district<br>hospitals<br>Private sector | NR                            | Sleep disturbances;<br>sleepiness<br>Stress; suicidal tendencies     |
| Mahmood, 2016<br>[53]<br>Norway | Generalists<br>Internists<br>Pediatricians<br>Surgical specialties<br>Anesthesiologists                                                                                                      | 450<br>(all time<br>points) | 41%          | 43y±2.8y                                                                                                       | Public health system<br>Private practice                                    | NR                            | Sleep deprivation due<br>to on-call shifts<br>Alcohol misuse         |

| Study<br>Country              | Physician and patient characteristics                |       |              | Setting                                                    |                                                                                                | Interventions or<br>exposures | Outcomes                                       |                                                       |
|-------------------------------|------------------------------------------------------|-------|--------------|------------------------------------------------------------|------------------------------------------------------------------------------------------------|-------------------------------|------------------------------------------------|-------------------------------------------------------|
|                               | Type                                                 | n=    | Sex (% male) | Age                                                        | Location                                                                                       |                               |                                                | Urban<br>or<br>rural                                  |
| Nishimura, 2014 [54]<br>Japan | Neurosurgeons and neurologists                       | 2,564 | NR           | NR                                                         | Stroke care centres<br>Teaching hospitals                                                      | NR                            | Sleep deprivation                              | Burnout                                               |
| Pit, 2014 [55]<br>Australia   | General practitioners                                | 92    | 60%          | 50±10.7y                                                   | NR                                                                                             | Rural                         | Work-related sleep disturbance                 | Early retirement intentions                           |
| Pit, 2016 [56]<br>Australia   | General practitioners                                | 92    | 60%          | 50±10.7y                                                   | Private (solo) practice<br>Group practice                                                      | Rural                         | Work-related sleep disturbance                 | Sickness presenteeism                                 |
| Roberts, 2014 [57]<br>US      | General internists<br>Internal medicine hospitalists | 578   | 58%          | Hospitalists:<br>46.9±12.4y<br>Generalists:<br>53.6±10.2y  | Private practice<br>Academic medical centre<br>Veterans hospital<br>Military practice<br>Other | NR                            | Fatigue                                        | Falling asleep while driving                          |
| Saadat, 2016 [60]<br>US       | Anesthesiologists                                    | 21    | 71%          | 30-40y: 57%<br>41-50y: 19%<br>51-55y: 24%<br>Range: 32-56y | Tertiary care academic children's hospital                                                     | NR                            | Sleep deprivation due to 17-h night call shift | Mood disturbances                                     |
| Saadat, 2017 [59]<br>US       | Anesthesiologists                                    | 21    | 65%          | Range: 32-56 years                                         | Tertiary care academic children's hospital                                                     | NR                            | Sleep deprivation due to 17-h night call shift | Reaction time                                         |
| Sanches, 2015 [61]<br>Spain   | Emergency medicine physicians                        | 18    | 28%          | 29.2±2.6y                                                  | Central hospital                                                                               | NR                            | Sleep deprivation                              | Cognitive and psychomotor abilities                   |
| Sargent, 2009 [62]<br>US      | Orthopedic surgeons                                  | 264   | 92%          | NR                                                         | Orthopedic surgery training programs                                                           | NR                            | Sleep deprivation                              | Burnout; psychological distress; marital satisfaction |
| Sende, 2012 [64]<br>France    | Emergency physicians                                 | 318   | 62%          | 39±8y                                                      | Hospitals<br>Mobile emergency services<br>Other unspecified                                    | NR                            | Fatigue; sleep deprivation                     | Stress                                                |

| Study<br>Country                                 | Physician and patient characteristics                                                                             |       |              |                                   | Setting                                                                                                                                 |                      | Interventions or<br>exposures | Outcomes                                 |
|--------------------------------------------------|-------------------------------------------------------------------------------------------------------------------|-------|--------------|-----------------------------------|-----------------------------------------------------------------------------------------------------------------------------------------|----------------------|-------------------------------|------------------------------------------|
|                                                  | Type                                                                                                              | n=    | Sex (% male) | Age                               | Location                                                                                                                                | Urban<br>or<br>rural |                               |                                          |
| Sexton, 2001 [65]<br>US                          | Consulting physicians:<br>Surgeons<br>Anesthesiologists<br>Pulmonary physicians<br>Cardiologists<br>Pediatricians | 271   | NR           | NR                                | Teaching and non-<br>teaching hospitals                                                                                                 | Urban                | Fatigue                       | Perceived performance<br>effectiveness   |
| Shanafelt, 2005<br>[67]<br>US, Canada,<br>Mexico | Oncologists                                                                                                       | 241   | 85%          | >50y: 51%                         | Community clinics<br>Hospitals<br>Private practice<br>Academic medical<br>centres                                                       | NR                   | Fatigue; sleep<br>deprivation | Quality of life/well-being               |
| Shanafelt, 2010<br>[66]<br>US                    | Surgeons                                                                                                          | 7,905 | 87%          | Median: 51y<br>Q1: 43y<br>Q2: 59y | Private practice<br>Academic medical<br>centres Veterans<br>hospital<br>Active military practice<br>Retired or not in<br>practice Other | NR                   | Fatigue                       | Perceived major medical<br>errors        |
| Shanafelt, 2014<br>[68]<br>US                    | Oncologists                                                                                                       | 1,117 | 52%          | Median: 52y                       | Private practice<br>Academic practice<br>Veteran's hospital<br>Industry, other                                                          | NR                   | Fatigue                       | Satisfaction with work-life<br>balance   |
| Shirom, 2006 [69]<br>Israel                      | Ophthalmologists<br>Dermatologists<br>Otolaryngologists<br>Gynecologists<br>General surgeons<br>Cardiologists     | 890   | 80%          | Median: 52y<br>SD: 7.2y           | Community clinics<br>Acute care hospital<br>outpatient clinics                                                                          | NR                   | Physical fatigue              | Perception of quality of<br>patient care |

| Study<br>Country                  | Physician and patient characteristics                                                                           |       |              | Setting                            |                                                                | Interventions or<br>exposures | Outcomes                                |                                                                                                |
|-----------------------------------|-----------------------------------------------------------------------------------------------------------------|-------|--------------|------------------------------------|----------------------------------------------------------------|-------------------------------|-----------------------------------------|------------------------------------------------------------------------------------------------|
|                                   | Type                                                                                                            | n=    | Sex (% male) | Age                                | Location                                                       |                               |                                         | Urban<br>or<br>rural                                                                           |
| Shirom, 2010 [70]<br>Israel       | Ophthalmologists<br>Dermatologists<br>Otolaryngologists<br>Gynecologists<br>General surgeons<br>Cardiologists   | 890   | 80%          | Median: 52y<br>SD: 7.2y            | Community clinics<br>Acute care hospital<br>outpatient clinics | NR                            | Physical fatigue                        | Burnout                                                                                        |
| Smith, 2017 [71]<br>UK            | General practitioners<br>Surgeons<br>Other unspecified<br>specialties                                           | 3,550 | 63%          | NR                                 | NR (varied)                                                    | NR                            | Perceived fatigue,<br>sleep deprivation | Physical and mental<br>health; competence                                                      |
| Starmer, 2016 [72]<br>US          | General pediatricians<br>Pediatric surgeons<br>Pediatric hospitalists<br>Pediatric specialists<br>(unspecified) | 840   | 40%          | NR                                 | NR (some in private<br>practice)                               | NR                            | Sleep deprivation                       | Burnout; balanced<br>personal and professional<br>commitments; life and<br>career satisfaction |
| Tanti, 2017 [73]<br>Malta         | Physicians (unspecified)                                                                                        | 204   | 62%          | Median: 41y                        | Hospitals<br>Community<br>Office-based                         | NR                            | Fatigue                                 | Prescribing errors                                                                             |
| Tokuda, 2009 [74]<br>Japan        | Hospital physicians:<br>Generalists<br>Other unspecified<br>specialties                                         | 236   | 75%          | 40.9±7.8y<br>Range: 26-76y         | Hospitals with ≥20<br>inpatient beds                           | NR                            | Sleep deprivation                       | Burnout; job satisfaction                                                                      |
| Vela-Bueno, 2008<br>[76]<br>Spain | Primary care physicians                                                                                         | 113   | 27%          | 41.4±8.0y                          | Primary care centres                                           | Urban                         | Sleep problems,<br>insomnia             | Burnout                                                                                        |
| Wada, 2010 [78]<br>Japan          | Physicians (unspecified)                                                                                        | 3,862 | 78%          | M: 75% 30-<br>59y<br>F: 85% 30-59y | Hospitals                                                      | NR                            | Sleep deprivation                       | Depressive symptoms                                                                            |

| Study<br>Country                    | Physician and patient characteristics                                               |    |              | Setting                                               |                      | Interventions or<br>exposures | Outcomes                                                                       |                                                                   |
|-------------------------------------|-------------------------------------------------------------------------------------|----|--------------|-------------------------------------------------------|----------------------|-------------------------------|--------------------------------------------------------------------------------|-------------------------------------------------------------------|
|                                     | Type                                                                                | n= | Sex (% male) | Age                                                   | Location             |                               |                                                                                | Urban<br>or<br>rural                                              |
| <b>Non-comparative design</b>       |                                                                                     |    |              |                                                       |                      |                               |                                                                                |                                                                   |
| Gander, 2008 [43]<br>New Zealand    | Anesthetists                                                                        | 20 | 85%          | Median: 44y                                           | Hospitals            | Urban                         | Sleep disturbance from consecutive working days or on-call work                | Psychomotor performance                                           |
| <b>Intervention studies (n=2)</b>   |                                                                                     |    |              |                                                       |                      |                               |                                                                                |                                                                   |
| <b>Randomized controlled trials</b> |                                                                                     |    |              |                                                       |                      |                               |                                                                                |                                                                   |
| Dutheil, 2013 [40]<br>France        | Emergency physicians                                                                | 17 | 35%          | 39.1y±6.9y                                            | University hospital  | Urban                         | Fatigue related to 14-h and 24-h shifts; sleep deprivation; low sleep quality; | Perceived stress; urine interleukine-8                            |
| Uchal, 2005 [75]<br>Norway          | Surgeons<br>Gynecologists<br>Orthopedic surgeons<br>Urologists<br>Vascular surgeons | 64 | 67%          | Median:<br>Post-call:<br>33.0y<br>Post-work:<br>38.0y | Government hospitals | NR                            | Sleep deprivation due to 24-h call shift                                       | Product quality, procedure effectiveness of a surgical simulation |

C: control group; F: female; h: hour(s); IQR: interquartile range; M: male; NR: not reported; S: study group; SD: standard deviation; Surg: surgical; Obst: obstetric; Q: quartile; UK: United Kingdom; US: United States of America; y: year(s)
