# Supplementary material for: Impact of fatigue and insufficient sleep on physician and patient outcomes: a systematic review
Source: PubMed Central journal article supplement — BMJ Open. 2018 Sep 21;8(9):e021967. doi: 10.1136/bmjopen-2018-021967 (PMC6157562; doi:10.1136/bmjopen-2018-021967), 2018-09-21
Supplement: bmjopen-2018-021967supp003.pdf [file bmjopen-2018-021967supp003.pdf]

### Supplementary file 3. Risk of bias assessments

Summary of risk of bias assessments for randomized controlled trials (n=2)<sup>a</sup>

| First Author, Year | Random sequence generation | Allocation concealment | Blinding of participants and personnel | Blinding of outcome assessment | Incomplete outcome data | Selective reporting | Other sources of bias | Overall risk of bias <sup>b</sup> |
|--------------------|----------------------------|------------------------|----------------------------------------|--------------------------------|-------------------------|---------------------|-----------------------|-----------------------------------|
| Dutheil, 2013      | Low                        | Unclear                | High                                   | High                           | Low                     | Low                 | High                  | High                              |
| Uchal, 2005        | Low                        | Low                    | Unclear                                | Low                            | Low                     | Low                 | Low                   | Unclear                           |

<sup>a</sup>Assessed using the Cochrane Collaboration's Risk of Bias Tool

<sup>b</sup>Overall risk of bias is Low if all domains are rated as low, High if at least one domain is assessed as high, and Unclear if at least one domain is assessed as unclear and no domains are assessed as high

Summary of quality assessments for cohort studies (n=6)<sup>a</sup>

| First Author, Year | Selection                               |                                    |                              |                                 |          | Comparability               |          | Outcome                  |                                 |                                  | Total Score <sup>b</sup> /9 |   |
|--------------------|-----------------------------------------|------------------------------------|------------------------------|---------------------------------|----------|-----------------------------|----------|--------------------------|---------------------------------|----------------------------------|-----------------------------|---|
|                    | Representativeness of exposed cohort /1 | Selection of non-exposed cohort /1 | Ascertainment of exposure /1 | Outcome not present at start /1 | Total /4 | Comparability of cohorts /2 | Total /2 | Assessment of outcome /1 | Adequate length of follow-up /1 | Adequate follow-up of cohorts /1 |                             |   |
| Chu, 2011          | 1                                       | 1                                  | 0                            | 1                               | 3        | 2                           | 2        | 1                        | 1                               | 1                                | 3                           | 8 |
| Ellman, 2004       | 1                                       | 1                                  | 1                            | 1                               | 4        | 1                           | 1        | 1                        | 1                               | 1                                | 3                           | 8 |
| Govindarajan, 2015 | 1                                       | 1                                  | 1                            | 1                               | 4        | 2                           | 2        | 1                        | 1                               | 1                                | 3                           | 9 |
| Rothschild, 2009   | 1                                       | 1                                  | 1                            | 1                               | 4        | 2                           | 2        | 1                        | 1                               | 1                                | 3                           | 9 |
| Schieman, 2008     | 1                                       | 1                                  | 1                            | 1                               | 4        | 1                           | 1        | 1                        | 1                               | 1                                | 3                           | 8 |
| Vinden, 2014       | 1                                       | 1                                  | 1                            | 1                               | 4        | 1                           | 1        | 1                        | 1                               | 1                                | 3                           | 8 |

<sup>a</sup>Assessed using the Newcastle-Ottawa Quality Assessment Scale

<sup>b</sup>An overall score of 7 to 9 stars is considered as low risk of bias, 4 to 6 as unclear risk of bias, and 3 or less as high risk of bias

Summary of risk of bias assessments for before-after studies (n=3)<sup>a</sup>

| <b>First Author, Year</b> | <b>Random sequence generation<sup>b</sup></b> | <b>Allocation concealment<sup>b</sup></b> | <b>Blinding of participants and personnel</b> | <b>Blinding of outcome assessment</b> | <b>Incomplete outcome data</b> | <b>Selective reporting</b> | <b>Other sources of bias<sup>c</sup></b> | <b>Overall risk of bias<sup>d</sup></b> |
|---------------------------|-----------------------------------------------|-------------------------------------------|-----------------------------------------------|---------------------------------------|--------------------------------|----------------------------|------------------------------------------|-----------------------------------------|
| Amirian, 2014             | NA                                            | NA                                        | High                                          | High                                  | Low                            | Low                        | High                                     | High                                    |
| Gerdes, 2008              | NA                                            | NA                                        | High                                          | High                                  | Low                            | Low                        | High                                     | High                                    |
| Lederer, 2006             | NA                                            | NA                                        | High                                          | High                                  | Low                            | Low                        | High                                     | High                                    |

<sup>a</sup>Assessed using Cochrane Effective Practice and Organization of Care (EPOC) Review Group’s criteria for before-after studies, adapted from the Cochrane Collaboration Risk of Bias Tool

<sup>b</sup>Assessed as ‘not applicable’ (NA) when the studies did not include a control group

<sup>c</sup>Assessed as High due to lack of a control group

<sup>d</sup>Overall risk of bias is Low if all domains are rated as low, High if at least one domain is assessed as high, and Unclear if at least one domain is assessed as unclear and no domains are assessed as high

Summary of risk of bias assessments for time series studies (n=1)<sup>a</sup>

| <b>First Author, Year</b> | <b>Intervention independent of other changes</b> | <b>Intervention effect pre-specified</b> | <b>Intervention unlikely to affect data collection</b> | <b>Allocation concealment<sup>a</sup></b> | <b>Incomplete outcome data</b> | <b>Selective reporting</b> | <b>Other sources of bias<sup>c</sup></b> | <b>Overall risk of bias<sup>d</sup></b> |
|---------------------------|--------------------------------------------------|------------------------------------------|--------------------------------------------------------|-------------------------------------------|--------------------------------|----------------------------|------------------------------------------|-----------------------------------------|
| Leitchfried, 2011         | Low                                              | High                                     | Low                                                    | NA                                        | Low                            | Low                        | High                                     | High                                    |

<sup>a</sup>Assessed using Cochrane Effective Practice and Organization of Care (EPOC) Review Group’s criteria for interrupted time series studies, adapted from the Cochrane Collaboration Risk of Bias Tool

<sup>b</sup>Assessed as not applicable (NA) when the studies did not include a control group

<sup>c</sup>Assessed as High due to lack of a control group

<sup>d</sup>Overall risk of bias is Low if all domains are rated as low, High if at least one domain is assessed as high, and Unclear if at least one domain is assessed as unclear and no domains are assessed as high

Summary of quality assessments for cross-sectional studies (n=34)<sup>a</sup>

| First Author, Year | Selection                         |                                        |          | Outcome                     |                                                      |                     |          | Total Score <sup>b</sup><br>/5 |
|--------------------|-----------------------------------|----------------------------------------|----------|-----------------------------|------------------------------------------------------|---------------------|----------|--------------------------------|
|                    | Adequacy of case definition<br>/1 | Representativeness of the sample<br>/1 | Total /2 | Assessment of outcome<br>/1 | Same method of ascertainment for entire sample<br>/1 | Response rate<br>/1 | Total /3 |                                |
| Aziz, 2004         | 0                                 | 0                                      | 0        | 0                           | 1                                                    | 0                   | 1        | 1                              |
| Beaujouan, 2005    | 1                                 | 0                                      | 1        | 0                           | 1                                                    | 0                   | 1        | 2                              |
| Chang, 2013        | 1                                 | 0                                      | 1        | 0                           | 1                                                    | 1                   | 2        | 3                              |
| Chen, 2008         | 1                                 | 0                                      | 1        | 0                           | 1                                                    | 0                   | 1        | 2                              |
| Doppia, 2011       | 1                                 | 1                                      | 2        | 0                           | 1                                                    | 1                   | 2        | 4                              |
| Elovaino, 2015     | 1                                 | 1                                      | 2        | 0                           | 1                                                    | 1                   | 2        | 4                              |
| Gander, 2000       | 1                                 | 1                                      | 2        | 0                           | 1                                                    | 1                   | 2        | 4                              |
| Harbeck, 2015      | 1                                 | 0                                      | 1        | 0                           | 1                                                    | 1                   | 2        | 3                              |
| Heponiemi, 2014    | 1                                 | 1                                      | 2        | 0                           | 1                                                    | 1                   | 2        | 4                              |
| Jackson, 2017      | 0                                 | 0                                      | 0        | 0                           | 1                                                    | 0                   | 1        | 1                              |
| Kanieta, 2011      | 1                                 | 0                                      | 1        | 0                           | 1                                                    | 1                   | 2        | 3                              |
| Lindfors, 2006     | 1                                 | 1                                      | 2        | 0                           | 1                                                    | 1                   | 2        | 4                              |
| Mahmood, 2017      | 1                                 | 0                                      | 1        | 0                           | 1                                                    | 0                   | 1        | 2                              |
| Nishimura, 2014    | 1                                 | 1                                      | 2        | 0                           | 1                                                    | 0                   | 1        | 3                              |
| Pit, 2014          | 1                                 | 0                                      | 1        | 0                           | 1                                                    | 1                   | 2        | 3                              |
| Pit, 2016          | 1                                 | 0                                      | 1        | 0                           | 1                                                    | 1                   | 2        | 3                              |
| Roberts, 2014      | 1                                 | 1                                      | 2        | 0                           | 1                                                    | 0                   | 1        | 3                              |
| Saadat, 2016       | 1                                 | 1                                      | 2        | 0                           | 1                                                    | 1                   | 2        | 4                              |
| Saadat, 2017       | 1                                 | 1                                      | 2        | 0                           | 1                                                    | 1                   | 2        | 4                              |
| Sanches, 2015      | 1                                 | 0                                      | 1        | 0                           | 1                                                    | 0                   | 1        | 2                              |
| Sargent, 2009      | 1                                 | 0                                      | 1        | 0                           | 1                                                    | 0                   | 1        | 2                              |

| First Author, Year | Selection                         |                                        |             | Outcome                     |                                                      |                     |             | Total Score <sup>b</sup><br>/5 |
|--------------------|-----------------------------------|----------------------------------------|-------------|-----------------------------|------------------------------------------------------|---------------------|-------------|--------------------------------|
|                    | Adequacy of case definition<br>/1 | Representativeness of the sample<br>/1 | Total<br>/2 | Assessment of outcome<br>/1 | Same method of ascertainment for entire sample<br>/1 | Response rate<br>/1 | Total<br>/3 |                                |
| Sende, 2010        | 1                                 | 0                                      | 1           | 0                           | 1                                                    | 0                   | 1           | 2                              |
| Sexton, 2001       | 1                                 | 0                                      | 1           | 0                           | 1                                                    | 0                   | 1           | 2                              |
| Shanafelt, 2005    | 1                                 | 0                                      | 1           | 0                           | 1                                                    | 1                   | 2           | 3                              |
| Shanafelt, 2010    | 1                                 | 1                                      | 2           | 0                           | 1                                                    | 0                   | 1           | 3                              |
| Shanafelt, 2014    | 1                                 | 0                                      | 1           | 0                           | 1                                                    | 1                   | 2           | 3                              |
| Shirom, 2006       | 1                                 | 1                                      | 2           | 0                           | 1                                                    | 1                   | 2           | 4                              |
| Shirom, 2010       | 1                                 | 1                                      | 2           | 0                           | 1                                                    | 1                   | 2           | 4                              |
| Smith, 2016        | 1                                 | 0                                      | 1           | 0                           | 1                                                    | 1                   | 2           | 3                              |
| Starmer, 2016      | 1                                 | 1                                      | 2           | 0                           | 1                                                    | 1                   | 2           | 4                              |
| Tanti, 2017        | 1                                 | 0                                      | 1           | 0                           | 1                                                    | 0                   | 1           | 2                              |
| Tokuda, 2009       | 1                                 | 1                                      | 2           | 0                           | 1                                                    | 1                   | 2           | 4                              |
| Vela-Bueno, 2008   | 1                                 | 1                                      | 2           | 0                           | 1                                                    | 1                   | 2           | 4                              |
| Wada, 2010         | 1                                 | 1                                      | 2           | 0                           | 1                                                    | 0                   | 1           | 3                              |

<sup>a</sup>Assessed using the Newcastle-Ottawa Quality Assessment Scale, adapted for cross-sectional studies

<sup>b</sup>An overall score of 4 to 5 stars is considered as low risk of bias, 3 as unclear risk of bias, and 2 or less as high risk of bias. For response rate, ≥50% was used as the criterion to be awarded a star

Summary of quality assessments for non-comparative studies (n=1)<sup>a</sup>

| First Author,<br>Year | Selection                               |                                                | Total<br>/2 | Exposure                          |             | Assessment<br>of outcome<br>/1 | Outcome                                                    |                            |             | Total<br>Score <sup>b</sup><br>/6 |
|-----------------------|-----------------------------------------|------------------------------------------------|-------------|-----------------------------------|-------------|--------------------------------|------------------------------------------------------------|----------------------------|-------------|-----------------------------------|
|                       | Adequacy<br>of case<br>definition<br>/1 | Representat-<br>iveness of<br>the sample<br>/1 |             | Ascertain-<br>ment of<br>exposure | Total<br>/1 |                                | Same method<br>of assessment<br>for entire<br>sample<br>/1 | Loss to<br>follow-up<br>/1 | Total<br>/3 |                                   |
| Gander, 2008          | 1                                       | 1                                              | 2           | 0                                 | 0           | 0                              | 1                                                          | 1                          | 2           | 4                                 |

<sup>a</sup>Assessed using the Newcastle-Ottawa Quality Assessment Scale, adapted by the authors to be suitable to the non-comparative design

<sup>b</sup>An overall score of 5 to 6 stars is considered as low risk of bias, 3 to 4 as unclear risk of bias, and 2 or less as high risk of bias
