# Supplementary material for: Impact of fatigue and insufficient sleep on physician and patient outcomes: a systematic review
Source: PubMed Central journal article supplement — BMJ Open. 2018 Sep 21;8(9):e021967. doi: 10.1136/bmjopen-2018-021967 (PMC6157562; doi:10.1136/bmjopen-2018-021967), 2018-09-21
Supplement: bmjopen-2018-021967supp004.pdf [file bmjopen-2018-021967supp004.pdf]

## Supplementary file 4. Detailed study outcomes

### Physician health and wellness outcomes and associations with fatigue

| Study                          | Study  | Exposures or interventions                                                                                            |                                                                                                                           | Outcomes                                                                                              | Associations between exposure and outcome                                                                                                                                              |
|--------------------------------|--------|-----------------------------------------------------------------------------------------------------------------------|---------------------------------------------------------------------------------------------------------------------------|-------------------------------------------------------------------------------------------------------|----------------------------------------------------------------------------------------------------------------------------------------------------------------------------------------|
| Risk of Bias (RoB)             | design | Assessment measure and time points                                                                                    | Baseline                                                                                                                  | Assessment measure and time points                                                                    |                                                                                                                                                                                        |
| Surgeons                       |        |                                                                                                                       |                                                                                                                           |                                                                                                       |                                                                                                                                                                                        |
| Jackson, 2017                  | CS     | Not feeling well rested: self-reported as 'unhealthy'                                                                 | 71% healthy, 28% unhealthy in terms of being well rested                                                                  | Job satisfaction: Abridged Job in General Scale; grouped into more or less satisfied using the median | Job satisfaction in those more vs. less satisfied: Healthy (well rested): 85% vs. 58%, p<0001; Unhealthy (not well rested): 15% vs. 42%, p<0.001                                       |
| RoB: high                      |        | Time points NR                                                                                                        |                                                                                                                           | Time points NR                                                                                        |                                                                                                                                                                                        |
| Nishimura, 2014                | CS     | Sleep hours/night: self-reported (continuous)                                                                         | Mean±SD sleep: 5.94±1.08h                                                                                                 | Burnout: Japanese MBI (severe: EE >4.0 and either DP >2.6 or PE <4.17)                                | 1) Mean±SD sleep for not burned out vs. mild to moderate vs. severe: 6.07±1.15 vs. 5.88±0.94 vs. 5.63±0.94, p<0.05;                                                                    |
| RoB: unclear                   |        | Time points NR                                                                                                        |                                                                                                                           | Time points NR                                                                                        | 2) Association between sleep and burnout (OR (95% CI)): bivariate 0.67 (0.61-0.73), p<0.001; multivariate including work characteristics and mental health: 0.84 (0.75-0.94), p=0.002. |
| Sargent, 2009                  | CS     | Sleep deprivation: self-reported on a 4-point scale (none, a little, quite a bit, a lot)                              | 21% none, 48% a little, 23% quite a bit, 8% a lot                                                                         | Burnout: MBI (norms NR); Marital satisfaction: RDAS; Psychological morbidity: GHQ-12 score ≥4         | 1) Positive correlation between sleep deprivation and EE, DP, psychological distress, lower marital satisfaction, all p<0.001. No relationship with PA.                                |
| RoB: high                      |        | Time points NR                                                                                                        |                                                                                                                           | Time points NR                                                                                        |                                                                                                                                                                                        |
| Anesthesiologists <sup>a</sup> |        |                                                                                                                       |                                                                                                                           |                                                                                                       |                                                                                                                                                                                        |
| Lederer, 2006                  | BA     | 24-h shift with on-call duty; Sleep hours and interruptions: self-reported; Tiredness: VAS from 0 (low) to 100 (high) | Mean±SD sleep: 4.1±1.7h; Number of interruptions: 0.8±1.1; Tiredness pre- vs. post-duty: 30.9±27.5 vs. 59.5±18.9, p=0.01. | Stress during duty: 4-point scale from 'calm' to 'very demanding'                                     | 1) Mean stress score during duty: 2.1.                                                                                                                                                 |
| RoB: high                      |        | Assessed pre- and post-duty                                                                                           |                                                                                                                           | Assessed post-duty                                                                                    |                                                                                                                                                                                        |

| Study<br>Risk of Bias (RoB)        | Study<br>design | Exposures or interventions                                                                                                                                                    |                                                                                                                                                                                                                                                                                                                                        | Outcomes                                                                                                                       | Associations between exposure and outcome                                                                                                                                                                                                                                                                                                                                                                                                                                                                                                                                                                                                                                                                                                                                  |
|------------------------------------|-----------------|-------------------------------------------------------------------------------------------------------------------------------------------------------------------------------|----------------------------------------------------------------------------------------------------------------------------------------------------------------------------------------------------------------------------------------------------------------------------------------------------------------------------------------|--------------------------------------------------------------------------------------------------------------------------------|----------------------------------------------------------------------------------------------------------------------------------------------------------------------------------------------------------------------------------------------------------------------------------------------------------------------------------------------------------------------------------------------------------------------------------------------------------------------------------------------------------------------------------------------------------------------------------------------------------------------------------------------------------------------------------------------------------------------------------------------------------------------------|
|                                    |                 | Assessment measure and<br>time points                                                                                                                                         | Baseline                                                                                                                                                                                                                                                                                                                               | Assessment measure and<br>time points                                                                                          |                                                                                                                                                                                                                                                                                                                                                                                                                                                                                                                                                                                                                                                                                                                                                                            |
| Leichtfried, 2011<br><br>RoB: high | TS              | 24-h shift;<br><br>Sleepiness: ESS (range: 0-24);<br><br>Sleep hours: self-reported (continuous)<br><br>Sleepiness assessed pre-shift, sleep hours pre, during and post-shift | ESS (mean (range)): 7.4 (4-12);<br>Mean±SD sleep hours:<br>1) pre-study: 7.74±1.35h;<br>2) Pre-24-h shift (11h00 on day 1: 0.13±0.35h, 19:00 on day 1: 6.99±0.68h);<br>3) During the 24-h shift (07h00 on day 2: 0.0±0.0h, 19h00 on day 2, 5.49±1.95h);<br>4) Post-24-h shift (11h00 on day 3: 0.5±0.71h, 19h00 on day 3: 7.06±1.18h). | aMT6-s: urinalysis<br><br>Assessed at 4-h intervals from 07:00 to 11:00                                                        | 1) aMT6-s over shift, mean (95% CI): higher at 11:00AM pre- (12.2 (6.3-8.1)) and post-shift (9.3 (3.7-14.9)) vs. during, p=0.016;<br>2) Correlations between sleep and aMT6-s (data NR): mild for sleep duration the night prior with aMT6-s at 3PM the following day; sleep on night 2 with aMT6-s at 3PM the next day; total sleep with aMT6-s at 11AM on third day; moderate for sleep on first night with aMT6-s at 7AM and 11AM pre-shift, 11PM during 24-h shift and 11AM post-shift; total sleep pre-shift and nocturnal sleep during 24-h shift with aMT6-s at 11PM during shift; total sleep with aMT6-s at 3PM on first and second day, 11PM on second day;<br>3) Correlations between ESS and aMT6-s: moderate for aMT6-s at 7AM during shift, 11AM on day off. |
| Beaujouan, 2005<br><br>RoB: high   | CS              | Sleep deprivation: 4-point scale (always, frequently, rarely, never)<br><br>Time points NR                                                                                    | 48.8% always or frequently feel sleep deprived                                                                                                                                                                                                                                                                                         | Substance abuse: 93-item addiction and substance abuse questionnaire<br><br>Time points NR                                     | 1) 60.6% with drug dependence vs. 46.0% of those without reported sleep difficulties, p<0.001.<br>2) OR (95% CI) of addiction for frequently/always vs. rarely/never sleep deprived: tobacco 1.42 (1.04-1.94); tranquilizer/hypnotics 3.26 (2.12-5.02).                                                                                                                                                                                                                                                                                                                                                                                                                                                                                                                    |
| Doppia, 2011<br><br>RoB: low       | CS              | Insufficient sleep: 4-point scale (no, not really, sort of, yes)<br><br>Time points NR                                                                                        | 28.9% reported insufficient sleep during work time                                                                                                                                                                                                                                                                                     | Burnout: CBI (mild: 1-2.4, moderate: 2.5-3.5, severe: 3.6-5)<br><br>Time points NR                                             | 1) Frequency of burnout by response for sleep sufficiency: 47.6% for no/not really, 16.3% for sort of/yes, p<0.001.                                                                                                                                                                                                                                                                                                                                                                                                                                                                                                                                                                                                                                                        |
| Lindfors, 2006<br><br>RoB: low     | CS              | Sleep hours/day: self-reported to the nearest 0.5h;<br>Adequacy of sleep and rest: self-reported (yes/no)                                                                     | Sleep hours (mean (range)): 7 (5-9)                                                                                                                                                                                                                                                                                                    | Stress: MOSQ on a 3-point scale (no, to some extent, clearly);<br>Thoughts of suicide: 4-point scale ('never' to 'have tried') | 1) Sleep sufficiency predicted stress symptoms: bivariate $\beta=-0.362$ , p<0.001; multivariate including gender, sick leave, suicide $\beta=-0.269$ , p<0.001;<br>2) Sleep disturbance associated with thoughts of suicide, p=0.009.                                                                                                                                                                                                                                                                                                                                                                                                                                                                                                                                     |

| Study                | Study  | Exposures or interventions                                                                                                                                                     |                                                                                                                                                                                                                                   | Outcomes                                                                                                     | Associations between exposure and outcome                                                                                                                                                                                                                                                                                                                                                                                                                                                                                                                                                                                                  |
|----------------------|--------|--------------------------------------------------------------------------------------------------------------------------------------------------------------------------------|-----------------------------------------------------------------------------------------------------------------------------------------------------------------------------------------------------------------------------------|--------------------------------------------------------------------------------------------------------------|--------------------------------------------------------------------------------------------------------------------------------------------------------------------------------------------------------------------------------------------------------------------------------------------------------------------------------------------------------------------------------------------------------------------------------------------------------------------------------------------------------------------------------------------------------------------------------------------------------------------------------------------|
| Risk of Bias (RoB)   | design | Assessment measure and time points                                                                                                                                             | Baseline                                                                                                                                                                                                                          | Assessment measure and time points                                                                           |                                                                                                                                                                                                                                                                                                                                                                                                                                                                                                                                                                                                                                            |
|                      |        | Time points NR                                                                                                                                                                 |                                                                                                                                                                                                                                   | Time points NR                                                                                               |                                                                                                                                                                                                                                                                                                                                                                                                                                                                                                                                                                                                                                            |
| Saadat, 2015         | CS     | Sleep deprivation (<7h/24-h) due to 17-h overnight shift; Sleepiness and alertness: VAS from 0 (not at all) to 100 (extremely)                                                 | Mean±SD sleepiness on a regular day vs. post-call day: 2.99±2.18 vs. 6.79±2.30, p<0.001                                                                                                                                           | Simple cognitive tests: VAS from 0 (not at all) to 100 (extremely); Mood disturbance: PMS (scoring NR)       | Regular day v. post-call day, mean±SD scores: 1) Simple cognitive tests: energetic 6.04±2.27 vs. 2.53±1.87, confident 7.03±1.83 vs. 4.98±2.29, irritable 2.03±1.94 vs. 4.86±2.16, sleepy 2.99±2.18 vs. 6.79±2.30, talkative 4.46±1.74 vs. 2.41±1.97, all p<0.001; jittery 1.44±1.74 vs. 3.12±2.34, p=0.003; anxiousness ns; 2) PMS: tension 13.48±2.71 vs. 15.43±4.46, p=0.049; anger 15.24±4.41 vs. 18.14±5.92, p=0.005; fatigue 10.14±2.63 vs. 20.05±6.87, p<0.001; confusion 10.57±1.69 vs. 12.57±4.24, p=0.025; vigor 24.05±6.75 vs. 16.67±5.70, p<0.001; depression: ns; total mood disturbance: 42.57±15.26 vs. 70.90±6.91, p<0.001. |
| RoB: low             |        | All assessed on a regular day and a post-call day                                                                                                                              |                                                                                                                                                                                                                                   | All assessed on a regular day and a post-call day                                                            |                                                                                                                                                                                                                                                                                                                                                                                                                                                                                                                                                                                                                                            |
| ER or ICU physicians |        |                                                                                                                                                                                |                                                                                                                                                                                                                                   |                                                                                                              |                                                                                                                                                                                                                                                                                                                                                                                                                                                                                                                                                                                                                                            |
| Dutheil, 2013        | RCT    | 14-h or 24-h shift; Sleep hours: self-reported sleep and wake time; Sleep quality: VAS from 1 (low) to 100 (high); Mental and physical fatigue: VAS from 1 (low) to 100 (high) | 1) Sleep duration and quality lower during shifts (14h and 24h) than any other day, and lower during the 24-h vs. 14-h shift (p<0.05); 2) Mental and physical fatigue higher after 14-h and 24-h shift vs. control day (data NR). | Stress: VAS from 0 (low) to 100 (high); IL-8: urinalysis Assessed at 08:30 and 18:30 on each day of protocol | 1) Stress: higher following 14-h and 24-h shifts vs. the control day, p<0.05 (data NR); 2) IL-8: higher following 24-h shift vs. control (p=0.007) and 14-h shift (p=0.015); ns difference between 14-h shift and control day; 3) Correlations with IL-8: sleep hours pre-24-h shift, r=-0.627, p=0.007; poor sleep quality during 14-h and 24-h shifts, r=0.452, p=0.031; 4) Multivariable regression: 24-h shift increased IL-8 by 1.9ng vs. control day, p=0.007; ns association with 14-h shift, mental or physical fatigue, sleep deprivation, 14-h shift.                                                                            |
| RoB: high            |        | Assessed on day prior to shift; during shift; each day of protocol (work, off, clerical, control)                                                                              |                                                                                                                                                                                                                                   |                                                                                                              |                                                                                                                                                                                                                                                                                                                                                                                                                                                                                                                                                                                                                                            |
| Sende, 2012          | CS     | Fatigue and sleep deprivation as sources of stress                                                                                                                             | NR                                                                                                                                                                                                                                | Most important sources of stress among 4 categories (work-related, patient-                                  | 1) 78% indicated that sleep loss and fatigue were sources of stress.                                                                                                                                                                                                                                                                                                                                                                                                                                                                                                                                                                       |
| RoB: high            |        |                                                                                                                                                                                |                                                                                                                                                                                                                                   |                                                                                                              |                                                                                                                                                                                                                                                                                                                                                                                                                                                                                                                                                                                                                                            |

| Study<br>Risk of Bias (RoB)       | Study<br>design | Exposures or interventions                                                                                                                                                                                          |                                                                                                                                                                                                                                                                                                                                                                                           | Outcomes                                                                                                                                                                                                                  | Associations between exposure and outcome                                                                                                                                                                                                                                                                                                                                                                                                                                    |
|-----------------------------------|-----------------|---------------------------------------------------------------------------------------------------------------------------------------------------------------------------------------------------------------------|-------------------------------------------------------------------------------------------------------------------------------------------------------------------------------------------------------------------------------------------------------------------------------------------------------------------------------------------------------------------------------------------|---------------------------------------------------------------------------------------------------------------------------------------------------------------------------------------------------------------------------|------------------------------------------------------------------------------------------------------------------------------------------------------------------------------------------------------------------------------------------------------------------------------------------------------------------------------------------------------------------------------------------------------------------------------------------------------------------------------|
|                                   |                 | Assessment measure and<br>time points                                                                                                                                                                               | Baseline                                                                                                                                                                                                                                                                                                                                                                                  | Assessment measure and<br>time points                                                                                                                                                                                     |                                                                                                                                                                                                                                                                                                                                                                                                                                                                              |
|                                   |                 | Time points NR                                                                                                                                                                                                      |                                                                                                                                                                                                                                                                                                                                                                                           | related, organizational,<br>individual)                                                                                                                                                                                   |                                                                                                                                                                                                                                                                                                                                                                                                                                                                              |
|                                   |                 |                                                                                                                                                                                                                     |                                                                                                                                                                                                                                                                                                                                                                                           | Time points NR                                                                                                                                                                                                            |                                                                                                                                                                                                                                                                                                                                                                                                                                                                              |
| <b>Generalists<sup>b</sup></b>    |                 |                                                                                                                                                                                                                     |                                                                                                                                                                                                                                                                                                                                                                                           |                                                                                                                                                                                                                           |                                                                                                                                                                                                                                                                                                                                                                                                                                                                              |
| Harbeck, 2015<br><br>RoB: unclear | CS              | 24-hours on-call shift with<br>sleep disturbance: self-<br>reported number of sleep<br>disturbances and hours of<br>sleep per night<br><br>Assessed before a normal<br>day shift, and after a 24-h on<br>call shift | 1) Sleep hours on a normal day<br>vs. following a 24-h shift:<br><2 hours: 0 vs. 5.9%; 2-4<br>hours: 5.9% vs. 47.1%; 4-6<br>hours: 11.8% vs. 35.3%; >6<br>hours: 82.4% vs. 11.8%<br><br>2) Number of sleep<br>disturbances a normal day vs.<br>following a 24-h shift:<br>0: 82.4% vs. 11.8%; 1: 11.8%<br>vs. 35.3%; 2: 5.9% vs. 47.1%; 3:<br>0% vs. 5.9%; 4: 0% vs. 0%; >4:<br>0% vs. 0% | Biochemical (laboratory<br>values) and physiological<br>(heart rate variability, skin<br>resistance, blood pressure)<br>stress parameters<br><br>Assessed before a normal<br>day shift, and after a 24-h<br>on call shift | Before a normal shift vs. after overnight call shift:<br>1) Biochemical parameters: no changes in any<br>parameter except for thyroid stimulating hormone<br>which was higher after the on-call shift (p = 0.049,<br>data NR);<br>2) Physiological parameters: no significant changes<br>in any parameter                                                                                                                                                                    |
| Pit, 2014<br><br>RoB: unclear     | CS              | Work-related sleep<br>disturbance: 7-point scale<br>from 'never' to 'every day'<br><br>Time points NR                                                                                                               | Work-related sleep<br>disturbance: 41% never, 59% a<br>few times a year to every day                                                                                                                                                                                                                                                                                                      | Early retirement (<65 years)<br>intentions (yes/no)<br><br>Time points NR                                                                                                                                                 | For sleep disturbance a few times a year to every<br>day vs. never:<br>1) Intention to retire early: 74% vs. 26%, p<0.01;<br>2) Association with intention to retire early (OR<br>(95% CI)): univariate 3.6 (1.47-8.80), p<0.01;<br>multivariate including work, occupational,<br>individual factors 2.91 (1.11-7.6), p<0.05;<br>4) RR (95% CI) for intention to retire early: 2.0<br>(1.18-3.49); attributable fraction: 50.0%;<br>population attributable fraction: 37.1%. |
| Pit, 2016<br><br>RoB: unclear     | CS              | Work-related sleep<br>disturbance: 7-point scale<br>from 'never' to 'every day'                                                                                                                                     | Work-related sleep<br>disturbance: 41% never, 59% a<br>few times a year to every day                                                                                                                                                                                                                                                                                                      | Sickness presenteeism: 'yes'<br>response indicated 1 or<br>more days                                                                                                                                                      | For sleep disturbance a few times a year to every<br>day vs. never:<br>1) Sickness presenteeism: 32% vs. 68%, p=0.018;                                                                                                                                                                                                                                                                                                                                                       |

| Study<br>Risk of Bias (RoB) | Study<br>design | Exposures or interventions                                                                                                        |                                                                                                                                                                                                                                                                                                                                                                                 | Outcomes                                                                                   | Associations between exposure and outcome                                                                                                                                                                                                                                                                                                                                                                                                                                                                                                                                                                                                                                                                                                                                                                                                                                                                                                                                                                                                                                                      |
|-----------------------------|-----------------|-----------------------------------------------------------------------------------------------------------------------------------|---------------------------------------------------------------------------------------------------------------------------------------------------------------------------------------------------------------------------------------------------------------------------------------------------------------------------------------------------------------------------------|--------------------------------------------------------------------------------------------|------------------------------------------------------------------------------------------------------------------------------------------------------------------------------------------------------------------------------------------------------------------------------------------------------------------------------------------------------------------------------------------------------------------------------------------------------------------------------------------------------------------------------------------------------------------------------------------------------------------------------------------------------------------------------------------------------------------------------------------------------------------------------------------------------------------------------------------------------------------------------------------------------------------------------------------------------------------------------------------------------------------------------------------------------------------------------------------------|
|                             |                 | Assessment measure and<br>time points                                                                                             | Baseline                                                                                                                                                                                                                                                                                                                                                                        | Assessment measure and<br>time points                                                      |                                                                                                                                                                                                                                                                                                                                                                                                                                                                                                                                                                                                                                                                                                                                                                                                                                                                                                                                                                                                                                                                                                |
|                             |                 | Time points NR                                                                                                                    |                                                                                                                                                                                                                                                                                                                                                                                 | Assessed for the past 12<br>months                                                         | 2) Association with sickness presenteeism (OR<br>(95% CI)): 2.92 (1.19-7.16), p=0.02.                                                                                                                                                                                                                                                                                                                                                                                                                                                                                                                                                                                                                                                                                                                                                                                                                                                                                                                                                                                                          |
| Roberts, 2014               | CS              | Fatigue: LAS from 0 (low) to<br>10 (high)                                                                                         | Mean (SD) score: 5.8 (2.4) for<br>hospitalists; 5.9 (2.4) for<br>general internists                                                                                                                                                                                                                                                                                             | Impact of fatigue on daily<br>activities (falling asleep<br>while driving) (yes/no)        | 1) 8.7% of hospitalists and 4.3% of outpatient<br>general internists had fallen asleep while driving<br>due to fatigue.                                                                                                                                                                                                                                                                                                                                                                                                                                                                                                                                                                                                                                                                                                                                                                                                                                                                                                                                                                        |
| RoB: unclear                |                 | Assessed for the past week                                                                                                        |                                                                                                                                                                                                                                                                                                                                                                                 | Time points NR                                                                             |                                                                                                                                                                                                                                                                                                                                                                                                                                                                                                                                                                                                                                                                                                                                                                                                                                                                                                                                                                                                                                                                                                |
| Vela-Bueno, 2008            | CS              | Sleep Quality: PSQI<br>(Spanish): score $\geq 5$ indicates<br>low quality (range; 0 to 21);<br>Insomnia: DSM-IV criteria          | Prevalence (% (95% CI)):<br>1) Sleep-onset latency >30<br>minutes: 8.4 (4.8-11.9);<br>2) Wake time after sleep onset<br>>30 minutes: 15.4 (10.8-19.9);<br>3) Early morning awakening:<br>22.5 (19.5-30.4);<br>4) Nonrestorative sleep: 22.5<br>(17.2-27.7);<br>5) Daytime impairment for $\geq 5$<br>days in past month: 14.2 (9.7-<br>18.6);<br>6) Insomnia: 18.8 (13.8-23.7). | Burnout: PBM with a 7-point<br>scale from 1 (never) to 7<br>(always)<br><br>Time points NR | Low vs. high burnout, mean $\pm$ SD:<br>1) Global PSQI: 2.72 $\pm$ 2.22 vs. 7.24 $\pm$ 4.17, p<0.001;<br>2) PSQI subscores: sleep quality: 0.54 $\pm$ 0.57 vs.<br>1.40 $\pm$ 0.83, p<0.001; sleep latency: 0.51 $\pm$ 0.80 vs.<br>1.38 $\pm$ 1.03, p=0.002; sleep duration: 0.45 $\pm$ 0.64 vs.<br>1.16 $\pm$ 0.92, p=0.003; sleep efficiency: 0.21 $\pm$ 0.57 vs.<br>0.77 $\pm$ 0.98, p=0.018; sleep disturbance: ns; use of<br>medication: 0.14 $\pm$ 0.49 vs. 0.57 $\pm$ 0.83, p=0.032;<br>daytime dysfunction: 0.52 $\pm$ 0.73 vs. 1.57 $\pm$ 0.88,<br>p=0.002.<br>3) Prevalence (95% CI) of insomnia symptoms:<br>sleep latency: 5.5% (2.5-11.5%) vs. 21.1% (10.5-<br>31.6%), p=0.015; wake time >30 min after sleep<br>onset: 9.4% (1.6-17.1%) vs. 25.5% (14.2-37.7%),<br>p=0.029; early awakening: 14.5% (5.1-23.8%) vs.<br>45.6 (32.7-58.4%), p<0.001; somewhat/very<br>dissatisfied with sleep: 5.5% (2.5-11.5%) vs. 50%<br>(37.1-62.8%), p<0.001; day impairment: 5.5% (2.5-<br>11.5%) vs. 38.2% (25.6-50.7%), p<0.001; insomnia:<br>7.3% (0.4-14%) vs. 39.7% (27.1-52.2%), p<0.001. |
| <b>Oncologists</b>          |                 |                                                                                                                                   |                                                                                                                                                                                                                                                                                                                                                                                 |                                                                                            |                                                                                                                                                                                                                                                                                                                                                                                                                                                                                                                                                                                                                                                                                                                                                                                                                                                                                                                                                                                                                                                                                                |
| Shanafelt, 2005             | CS              | Fatigue: LASA QOL $\leq 7$ ;<br>Sleep deprivation: 10-point<br>Likert scale from 0 (not at<br>all) to 10 (stressful as can<br>be) | 75% had a high level of fatigue;<br>Mean $\pm$ SD sleep score:<br>4.5 $\pm$ 2.65.                                                                                                                                                                                                                                                                                               | Wellbeing: 10-item LASA<br>QOL, high $\geq 8$ vs. low $\leq 7$<br><br>Time points NR       | 1) Sleep deprivation for high vs. low overall well-<br>being (mean $\pm$ SD): 3.9 $\pm$ 2.57 vs. 5.1 $\pm$ 2.60, p=0.0004;<br>2) Lower fatigue predicted overall wellbeing in a<br>multivariate model including personal and<br>professional characteristics, p=0.002.                                                                                                                                                                                                                                                                                                                                                                                                                                                                                                                                                                                                                                                                                                                                                                                                                         |
| RoB: unclear                |                 |                                                                                                                                   |                                                                                                                                                                                                                                                                                                                                                                                 |                                                                                            |                                                                                                                                                                                                                                                                                                                                                                                                                                                                                                                                                                                                                                                                                                                                                                                                                                                                                                                                                                                                                                                                                                |

| Study<br>Risk of Bias (RoB)         | Study<br>design | Exposures or interventions                                                              |                                                              | Outcomes                                                                                                                                                             | Associations between exposure and outcome                                                                                                                                                                                                                                                                                                                                                                                                             |
|-------------------------------------|-----------------|-----------------------------------------------------------------------------------------|--------------------------------------------------------------|----------------------------------------------------------------------------------------------------------------------------------------------------------------------|-------------------------------------------------------------------------------------------------------------------------------------------------------------------------------------------------------------------------------------------------------------------------------------------------------------------------------------------------------------------------------------------------------------------------------------------------------|
|                                     |                 | Assessment measure and<br>time points                                                   | Baseline                                                     | Assessment measure and<br>time points                                                                                                                                |                                                                                                                                                                                                                                                                                                                                                                                                                                                       |
|                                     |                 | Time points NR                                                                          |                                                              |                                                                                                                                                                      |                                                                                                                                                                                                                                                                                                                                                                                                                                                       |
| Shanafelt, 2014<br><br>RoB: unclear | CS              | Fatigue: 10-point LAS (lower scores indicate greater fatigue)                           | Mean±SD fatigue score: 5.7±2.4                               | Satisfaction with WLB: 5-point Likert scale from ‘strongly agree’ to ‘strongly disagree’                                                                             | 1) OR (95%CI) of lower satisfaction predicted by high fatigue (vs. not) in multivariate model including personal and work-related factors, and burnout: 0.489 (0.337-0.710), p<0.001.                                                                                                                                                                                                                                                                 |
|                                     |                 | Time points NR                                                                          |                                                              |                                                                                                                                                                      |                                                                                                                                                                                                                                                                                                                                                                                                                                                       |
| Time points NR                      |                 |                                                                                         |                                                              |                                                                                                                                                                      |                                                                                                                                                                                                                                                                                                                                                                                                                                                       |
| Mixed groups of physicians          |                 |                                                                                         |                                                              |                                                                                                                                                                      |                                                                                                                                                                                                                                                                                                                                                                                                                                                       |
| Aziz, 2004<br><br>RoB: high         | CS              | Working while fatigued: 5-point scale from ‘extreme’ to ‘a little’                      | NR                                                           | Stress: 47-item questionnaire with a 5-point scale from ‘extreme’ to ‘a little’                                                                                      | 1) Sources of stress: working while fatigued had a mean±SD score of 2.44±1.20, factor loading: 0.653, in factor analysis;<br>2) Inverse correlation between stress and working while fatigued: r=-0.270 (significance level NR).                                                                                                                                                                                                                      |
|                                     |                 | Time points NR                                                                          |                                                              |                                                                                                                                                                      |                                                                                                                                                                                                                                                                                                                                                                                                                                                       |
|                                     |                 | Time points NR                                                                          |                                                              |                                                                                                                                                                      |                                                                                                                                                                                                                                                                                                                                                                                                                                                       |
| Chen, 2008<br><br>RoB: high         | CS              | Sleepiness: ESS score ≥11                                                               | Mean±SD ESS score: 7.8±4.0, range: 0-20, 23% had scores ≥11. | Impact on work and personal life: Impact Questionnaire with a 5-point Likert scale from 1 (strongly agree) to 5 (strongly disagree)                                  | 1) Impact score correlated with ESS, r=0.31, p<0.05;<br>2) ESS score was higher among physicians who agree/strongly agree vs. other response: worried about having a car accident while driving home post-call: 5.4 vs. 7.0, p<0.001; sleep loss has a major impact on personal life: 8.4 vs. 7.0, p=0.01;<br>3) Higher ESS scores predicted by impact score in multivariate regression including personal and work-related factors: β=0.11, p=0.005. |
|                                     |                 | Time points NR                                                                          |                                                              |                                                                                                                                                                      |                                                                                                                                                                                                                                                                                                                                                                                                                                                       |
|                                     |                 | Time points NR                                                                          |                                                              |                                                                                                                                                                      |                                                                                                                                                                                                                                                                                                                                                                                                                                                       |
| Elovaino, 2015<br><br>RoB: low      | CS              | Sleeping problems: Jenkins Scale with a 6-point scale from 1 (never) to 6 (every night) | Mean±SD score: 2006: 2.30 (1.00); 2010: 2.35 (1.05).         | Jobs demands: 5 items scored on a 5-point scale from 1 (strongly disagree) to 5 (strongly agree);<br>Job control: 3 items derived from the Karasek Job Questionnaire | There was no association between sleeping problems in 2006 and job demands or control in 2010.                                                                                                                                                                                                                                                                                                                                                        |
|                                     |                 | Assessed in 2006 and 2010                                                               |                                                              |                                                                                                                                                                      |                                                                                                                                                                                                                                                                                                                                                                                                                                                       |

| Study<br>Risk of Bias (RoB)     | Study<br>design | Exposures or interventions                                                                                                             |                                                                                             | Outcomes                                                                                                                                                                                                           | Associations between exposure and outcome                                                                                                                                                                                                                                                                                                                                                 |
|---------------------------------|-----------------|----------------------------------------------------------------------------------------------------------------------------------------|---------------------------------------------------------------------------------------------|--------------------------------------------------------------------------------------------------------------------------------------------------------------------------------------------------------------------|-------------------------------------------------------------------------------------------------------------------------------------------------------------------------------------------------------------------------------------------------------------------------------------------------------------------------------------------------------------------------------------------|
|                                 |                 | Assessment measure and<br>time points                                                                                                  | Baseline                                                                                    | Assessment measure and<br>time points                                                                                                                                                                              |                                                                                                                                                                                                                                                                                                                                                                                           |
| Heponiemi, 2014<br><br>RoB: low | CS              | Sleeping problems: Jenkins Scale <sup>81</sup> with a 6-point scale from 1 (never) to 6 (every night)<br><br>Assessed in 2006          | Mean±SD (range) score:<br>2.30±1.00 (1-6)                                                   | Psychological distress: GHQ-12 with a 4-point scale (low to high);<br>Job satisfaction: JDS with a Likert scale from 1 (strongly disagree) to 5 (strongly agree)<br><br>Assessed in 2010                           | 1) Sleeping problems associated with job satisfaction, $\beta=-0.12$ , $p<0.001$ , psychological distress, $\beta=0.18$ , $p<0.001$ ;<br>2) Total indirect effect of on-call duty through two mediators (sleeping problems, work interference with family) ( $R^2$ (95% CI)): job satisfaction 0.06 (-0.059, -0.016), $p<0.001$ ; psychological distress 0.16 (0.023, 0.081), $p<0.001$ . |
| Mahmood, 2016<br><br>RoB: high  | CS              | Sleep deprivation: self-reported mean hours of sleep when on call<br><br>Assessed at 4 years, 10 years, and 15 years post-graduation   | Mean±SD hours:<br>4 years: 4.52 (2.79);<br>10 years: 5.38 (6.36);<br>15 years: 6.41 (7.14). | Alcohol use disorders: Modified 9-item version of the Alcohol Use Disorder Identification Test (AUDIT) $\geq 6$ for men and $\geq 5$ for women.<br><br>Assessed at 4 years, 10 years, and 15 years post-graduation | There was no association between hours of sleep when on call and hazardous drinking behaviours ( $p=0.732$ )                                                                                                                                                                                                                                                                              |
| Shirom, 2010<br><br>RoB: low    | CS              | Tiredness and exhaustion: SMBM Physician Fatigue Subscale on a 7-point scale from 1 (almost never) to 7 (always)<br><br>Time points NR | NR                                                                                          | Burnout: SMBM on a 7-point scale from 1 (almost never) to 7 (always)                                                                                                                                               | 1) Correlation between physical fatigue subscale and overall burnout: 0.88, $p<0.05$ ;<br>2) In a predictive structural model for burnout, physical fatigue accounted for unique variance in the burnout items, not accounted for by total burnout ( $R^2=0.24$ ).                                                                                                                        |
| Smith, 2017<br><br>RoB: unclear | CS              | Sleep deprivation: self-reported via open-ended comments<br><br>Time points NR                                                         | NR                                                                                          | Mental and physical illness: self-reported via open-ended comments<br><br>Time points NR                                                                                                                           | Some physicians reported developing mental illness (e.g., bipolar disorder, alcohol misuse) due to tiredness and stress at work; others developed physical health problems due to sleep deprivation, poor eating habits and lack of exercise.                                                                                                                                             |

| Study<br>Risk of Bias (RoB)    | Study<br>design | Exposures or interventions                                                                                              |                                                                                                                                                                | Outcomes                                                                                                                                                                                                                       | Associations between exposure and outcome                                                                                                                                                                                                                                                                                                                                                                                                                                                                                                                                                |
|--------------------------------|-----------------|-------------------------------------------------------------------------------------------------------------------------|----------------------------------------------------------------------------------------------------------------------------------------------------------------|--------------------------------------------------------------------------------------------------------------------------------------------------------------------------------------------------------------------------------|------------------------------------------------------------------------------------------------------------------------------------------------------------------------------------------------------------------------------------------------------------------------------------------------------------------------------------------------------------------------------------------------------------------------------------------------------------------------------------------------------------------------------------------------------------------------------------------|
|                                |                 | Assessment measure and<br>time points                                                                                   | Baseline                                                                                                                                                       | Assessment measure and<br>time points                                                                                                                                                                                          |                                                                                                                                                                                                                                                                                                                                                                                                                                                                                                                                                                                          |
| Starmer, 2016<br><br>RoB: low  | CS              | Sleep deprivation: <7 hours<br>sleep in a typical 24-h period<br>(self-reported)<br><br>Time points NR                  | 27.7% sleep deprived                                                                                                                                           | Burnout, satisfaction with<br>career and life, balanced<br>personal and professional<br>commitments: Each on a 5-<br>point Likert scale (strongly<br>agree to strongly disagree)<br><br>Time points NR                         | ≥7-h vs. <7-h sleep:<br>1) Burnout (% strongly agree/agree): 26.4% vs.<br>39.6%, $p<0.05$ ; career satisfaction (% strongly<br>agree/agree): ns; life satisfaction (%<br>completely/very satisfied): 76.4% vs. 55.9%,<br>$p<0.05$ ; balanced personal and professional<br>commitments (% completely/very satisfied): 49.7%<br>vs. 26.1%.<br>2) <7-h sleep (vs. ≥7-h) (OR, 95% CI) associated<br>with life satisfaction 0.44 (0.29-0.67), $p<0.05$ ;<br>balanced personal/professional commitments 0.46<br>(0.31-0.71), $p\leq 0.05$ , in a model including work and<br>personal factors. |
| Tokuda, 2009<br><br>RoB: low   | CS              | Sleep hours/day: self-<br>reported (continuous)<br><br>Time points NR (included<br>weekday and weekends)                | Mean±SD (range) sleep<br>hours/day: 6±0.9 (3-8)                                                                                                                | Burnout: MBI (Japanese)<br>with a 7-point Likert<br>scale: 0 (none) to 6 (every<br>day);<br>Job satisfaction: JHPSS<br>with a 5-point Likert<br>scale: 1 (strongly<br>disagree) to 5 (strongly<br>agree)<br><br>Time points NR | Maximum likelihood estimates±SE:<br>1) Sleeping time to job satisfaction: group<br>0.990±0.458, $p=0.031$ ; ns for men; women<br>1.711±0.805, $p=0.034$ ;<br>2) Sleeping time to EE: group -0.219 ±0.070,<br>$p=0.002$ ; men -0.215±0.082, $p=0.009$ ; ns for<br>women.                                                                                                                                                                                                                                                                                                                  |
| Wada, 2010<br><br>RoB: unclear | CS              | Sleep hours/day: Self-<br>reported (continuous)<br><br>Assessed for past month<br>when not completing<br>overnight work | <5 hours: 8.7% men, 9.9%<br>women; 5 to <6 hours: 32.3%<br>men, 34.6% women; 6 to <7<br>hours: 46.0% men, 43.7%<br>women; ≥7 hours: 13.0% men,<br>11.8% women. | Depression: QIDS-SR;<br>Japanese score <5 (no<br>symptoms) to >20 (very<br>severe symptoms)<br><br>Assessed for past 7 days                                                                                                    | 1) Sleep hours for those with vs. without<br>depressive symptoms: <5: 18.7% vs. 7.7% men,<br>20.5% vs. 8.7% women; 5 to <6: 33.7% vs. 32.2%<br>men, 38.6% vs. 34.2% women; 6 to <7: 35.1% vs.<br>46.9% men; 31.8% vs. 45.1% women;<br>2) Association between <5h sleep (vs. 6-7h) and<br>depressive symptoms (OR (95% CI)): univariate<br>2.79 (1.96-3.95) for men, 2.65 (1.47-4.78) for<br>women; multivariate (including age and workload                                                                                                                                              |

| Study<br>Risk of Bias (RoB) | Study<br>design | Exposures or interventions            |          | Outcomes                              | Associations between exposure and outcome<br>factors) 2.70 (1.82-4.03) for men, 2.38 (1.11-5.10)<br>for women. |
|-----------------------------|-----------------|---------------------------------------|----------|---------------------------------------|----------------------------------------------------------------------------------------------------------------|
|                             |                 | Assessment measure and<br>time points | Baseline | Assessment measure and<br>time points |                                                                                                                |

<sup>a</sup>Includes studies of anesthesiologists, where these were physicians.

<sup>b</sup>Includes primary care physicians, internal medicine physicians, and general practitioners.

AM: morning; aMT6-s: melatonin metabolite; BA: before-after; CI: confidence interval; CBI: Copenhagen Burnout Inventory; CS: cross-sectional; DP: depersonalization; DSM: Diagnostic and Statistical Manual of Mental Disorders; EE: emotional exhaustion; ER: emergency; ESS: Epworth Sleepiness Scale; GHQ: General Health Questionnaire; h: hour(s); ICU: intensive care unit; IL-8: interleukin-8; JDS: Job Diagnostic Survey; JHPSS: Japanese Hospital Physicians Satisfaction Scale; LAS: linear analog scale; LASA: linear analog assessment scales; MBI: Maslach Burnout Inventory; MOSQ: Modified Occupational Stress Questionnaire; min: minute(s); NA: not applicable; NR: not reported; ns: not statistically significant; OR: odds ratio; PA: personal achievement; PBM: Pines Burnout Measure; PE: professional efficacy; PM: afternoon; PMS: Profile of Mood States; PSQI: Pittsburgh Sleep Quality Index; QIDS-SR: Quick Inventory Depressive Scale – Self-Reported; QOL: Quality of Life; RCT: randomized controlled trial; RDAS: Revised Dyadic Adjustment Scale; RoB: Risk of Bias; SD: standard deviation; SE: standard error; SMBM: Shirom-Melamed Burnout Measure; TS: time series; US: United States of America; VAS: visual analog scale; vs.: versus; WLB: work-life balance

# Performance and safety outcomes related to fatigue or sleep loss among physicians in independent practice

| Study              | Study  | Exposures or intervention                                                                                                                      |                                                                                                                                                 | Outcomes                                                                                                                                                | Associations between exposure and outcome                                                                                                                                                                              |
|--------------------|--------|------------------------------------------------------------------------------------------------------------------------------------------------|-------------------------------------------------------------------------------------------------------------------------------------------------|---------------------------------------------------------------------------------------------------------------------------------------------------------|------------------------------------------------------------------------------------------------------------------------------------------------------------------------------------------------------------------------|
| Risk of Bias (RoB) | design | Assessment measure and time points                                                                                                             | Baseline                                                                                                                                        | Assessment measure and time points                                                                                                                      |                                                                                                                                                                                                                        |
| Surgeons           |        |                                                                                                                                                |                                                                                                                                                 |                                                                                                                                                         |                                                                                                                                                                                                                        |
| Uchal, 2005        | RCT    | Sleep deprivation from a 24-h call shift vs. 8-h work; Sleep hours: self-reported (continuous); Sleepiness: ESS (moderate: 10-15, severe: ≥16) | Median (range) sleep hours: 1.5 (0-3) post-call vs. 6.5 (5-9) post-work, p<0.05; Median ESS score: 7.0 post-call vs. 5.5 post-work, ns.         | Surgical performance: laparoscopic surgical simulator(Minimally Invasivs Surgical Trainer-Virtual Reality) for product quality, procedure effectiveness | Post call vs. post-work: 1) Product quality: no difference in accuracy error, tissue damage, leak rate; 2) Procedure effectiveness: no difference in goal-directed actions, non-goal directed actions, operating time. |
| RoB: unclear       |        | Assessed post-call and post-work                                                                                                               |                                                                                                                                                 | Assessed post-call and post-work                                                                                                                        |                                                                                                                                                                                                                        |
| Chu, 2011          | CO     | Sleep deprivation: self-reported hours, moderate (3-6h) or severe (<3h)                                                                        | Of 4,047 procedures, 83 (2.1%) performed by severely sleep-deprived and 1,595 (39.4%) moderately sleep-deprived surgeons                        | Surgical performance: CABG, ACC                                                                                                                         | For 0-3 vs. 3-6 vs. >6 hours of sleep: no difference in CABG or ACC.                                                                                                                                                   |
| RoB: low           |        | Assessed the night before surgery                                                                                                              |                                                                                                                                                 | Assessed during surgery                                                                                                                                 |                                                                                                                                                                                                                        |
| Ellman, 2004       | CO     | Sleep deprivation: performed a case starting 22:00 to 05:00, or ending 22:00 to 07:30 and another case in the next 24-h                        | Of 6,751 procedures, 339 (5%) performed by sleep-deprived surgeons                                                                              | Surgical performance: CABG, ACC                                                                                                                         | Sleep deprived vs. non-sleep deprived: no difference in CABG or ACC.                                                                                                                                                   |
| RoB: low           |        |                                                                                                                                                |                                                                                                                                                 | Assessed during surgery                                                                                                                                 |                                                                                                                                                                                                                        |
| Govindarajan, 2015 | CO     | Sleep deprivation: treated patients from midnight to 07:00 and performed a subsequent case on the same day                                     | NR                                                                                                                                              | Surgical performance: duration of surgery                                                                                                               | Sleep deprived vs. non-sleep deprived: no difference in duration of surgery, even after stratification by type of procedure.                                                                                           |
| RoB: low           |        |                                                                                                                                                |                                                                                                                                                 |                                                                                                                                                         |                                                                                                                                                                                                                        |
| Amirian, 2014      | BA     | 17-h night call shift; Sleep hours during the shift: Wrist-mounted Micro-Mini-Motionlogger; Sleepiness: KSS                                    | Naps pre-call: 11 (37%) napped for median (IQR) 90 (58-128) min; Median (IQR) sleep: 91 (62-123) min on the pre-call night vs. 430 (329-449) on | Surgical performance: LapSimGyn laparoscopic simulation for time, blood loss, instrument path; D2 test of attention and concentration                   | Pre- vs. post-call: 1) LapSimGyn: no difference in total time, blood loss, instrument path length, instrument angular path; napping did not affect performance;                                                        |
| RoB: high          |        |                                                                                                                                                |                                                                                                                                                 |                                                                                                                                                         |                                                                                                                                                                                                                        |

| Study<br>Risk of Bias (RoB)          | Study<br>design | Exposures or intervention                                                                                                                                               |                                                                                                                                                                                                              | Outcomes                                                                                                                                                                                                                    | Associations between exposure and outcome                                                                                                                                                                                                                                                                                                                                                                     |
|--------------------------------------|-----------------|-------------------------------------------------------------------------------------------------------------------------------------------------------------------------|--------------------------------------------------------------------------------------------------------------------------------------------------------------------------------------------------------------|-----------------------------------------------------------------------------------------------------------------------------------------------------------------------------------------------------------------------------|---------------------------------------------------------------------------------------------------------------------------------------------------------------------------------------------------------------------------------------------------------------------------------------------------------------------------------------------------------------------------------------------------------------|
|                                      |                 | Assessment measure and<br>time points                                                                                                                                   | Baseline                                                                                                                                                                                                     | Assessment measure and<br>time points                                                                                                                                                                                       |                                                                                                                                                                                                                                                                                                                                                                                                               |
|                                      |                 | Assessed on pre-call and on-call day; sleepiness assessed during shift                                                                                                  | the on-call night, $p<0.001$ ;<br>Sleep on-call: 12 (40%) slept for median (IQR) 98 (39-135) min;<br>Significant development of sleepiness during shift ( $p<0.001$ ), plateau score of 7 at 04:00 to 08:00. | Assessed on pre-call and on-call day                                                                                                                                                                                        | 2) D2 test: improvement in concentration, $p<0.05$ . No changes in any other parameters;<br>3) ns difference in laparoscopic simulation time in those who slept during the shift vs. not.                                                                                                                                                                                                                     |
| Gerdes, 2008<br><br>RoB: high        | BA              | On-call shift;<br>Fatigue: questionnaire designed by Behrenz & Monga, 1999;<br>Sleep hours: self-reported (continuous)<br><br>Assessed in 3 sessions pre- and post-call | Fatigue differential from pre- to post-call (range): 1-7 (units unclear);<br>Sleep during call (range): 1-5h                                                                                                 | Psychomotor performance: virtual ring transfer task for gesture-level proficiency, hand movement smoothness, tool movement smoothness, elapsed time<br><br>Assessed in 3 sessions pre- and post-call                        | 1) Pre- to post-call: decrease in all measures of psychomotor proficiency ( $p<0.05$ , data NR) except elapsed time; no change in number of psychomotor errors; increase cognitive errors ( $p<0.05$ , data NR);<br>2) Cognitive errors increased exponentially as fatigue ratings increased ( $R^2=0.9219$ ) and as hours of sleep declined ( $R^2=0.933$ ).                                                 |
| Shanafelt, 2010<br><br>RoB: unclear  | CS              | Degree of fatigue as a contributor to errors (self-reported)<br><br>Assessed for the past 3 months                                                                      | NR                                                                                                                                                                                                           | Perceived recent major medical errors (self-reported)<br><br>Assessed for the past 3 months                                                                                                                                 | 1) Prevalence of perceived recent major medical error: 8.9%;<br>2) Of those reporting an error, 6.9% listed degree of fatigue as the greatest contributing factor.                                                                                                                                                                                                                                            |
| <b>Anesthesiologists<sup>a</sup></b> |                 |                                                                                                                                                                         |                                                                                                                                                                                                              |                                                                                                                                                                                                                             |                                                                                                                                                                                                                                                                                                                                                                                                               |
| Lederer, 2006<br><br>RoB: high       | BA              | 24-h shift, on-call duty;<br>Sleep hours and interruptions: self-reported;<br>Tiredness: VAS from 0 (low) to 100 (high)<br><br>Assessed pre- and post-duty              | Mean $\pm$ SD sleep: 4.1 $\pm$ 1.7h;<br>Number of interruptions: 0.8 $\pm$ 1.1;<br>Tiredness pre- vs. post-duty: 30.9 $\pm$ 27.5 vs. 59.5 $\pm$ 18.9, $p=0.01$ .                                             | Psychomotor performance: reaction time, critical flicker fusion, response measure, peripheral awareness;<br>Concentration ability: scale of 0 (low tiredness) to 100 (maximum tiredness)<br><br>Assessed pre- and post-duty | Pre- vs. post-duty, mean $\pm$ SD:<br>1) Psychometric testing: recognition reaction time (ms): 439.6 $\pm$ 50.8 vs. 480.3 $\pm$ 58.9; motor reaction time (ms): 252.8 $\pm$ 39.3 vs. 465.4 $\pm$ 65.0; total reaction time (ms): 690.8 $\pm$ 73.4 vs. 746.5 $\pm$ 113.7; critical flicker fusion (Hz): 29.0 $\pm$ 2.3 vs. 28.7 $\pm$ 3.7; response measure (pixels): 647.8 $\pm$ 126.7 vs. 598.3 $\pm$ 138.1, |

| Study<br>Risk of Bias (RoB)     | Study<br>design | Exposures or intervention<br>Assessment measure and<br>time points                                                                                                          | Baseline                                                                                         | Outcomes<br>Assessment measure and<br>time points                                                                                                    | Associations between exposure and outcome                                                                                                                                                                                                                                                                                                                                                                                                                                                                                                                                                                              |
|---------------------------------|-----------------|-----------------------------------------------------------------------------------------------------------------------------------------------------------------------------|--------------------------------------------------------------------------------------------------|------------------------------------------------------------------------------------------------------------------------------------------------------|------------------------------------------------------------------------------------------------------------------------------------------------------------------------------------------------------------------------------------------------------------------------------------------------------------------------------------------------------------------------------------------------------------------------------------------------------------------------------------------------------------------------------------------------------------------------------------------------------------------------|
|                                 |                 |                                                                                                                                                                             |                                                                                                  |                                                                                                                                                      | peripheral awareness task recognition time:<br>58.9±59.2 vs. 51.6±47.5;<br>2) Concentration ability: 26.4±23.5 vs.<br>56.3±23.0, p=0.007.                                                                                                                                                                                                                                                                                                                                                                                                                                                                              |
| Chang, 2013<br><br>RoB: unclear | CS              | 15-h in-house overnight call;<br>Sleepiness pre-call: ESS ≥9;<br>Sleep hours: self-reported<br>(continuous)<br><br>Sleepiness assessed pre-call,<br>sleep hours during call | Median (IQR) ESS: 9 (9),<br>64% scored ≥9;<br>Median (IQR) hours slept<br>during shift: 1 (0-3). | Psychomotor performance:<br>reaction time; CCPT II; N-<br>back; HVLT (3 trials of 12<br>words)<br><br>Assessed at baseline and pre-<br>and post-call | 1) Afternoon baseline vs. pre-call: no<br>difference in reaction time, CCPT, N-back, of<br>HVLT;<br>Morning baseline vs. post-call:<br>1) No change in auditory or visual reaction<br>time;<br>2) CCPT (t-scores): No change in detectability,<br>response style, hit reaction time,<br>omissions/commissions;<br>3) N-back % accuracy: no change for auditory,<br>visual, or mean N-value;<br>4) HVLT (t-score): mean for trials 1-3: 48.6±7.6<br>vs. 41.5±9.9 (p=0.04); delayed recall: ns;<br>5) No correlation between ESS scores pre-call<br>or sleep during shift and any measure of<br>psychomotor performance. |
| Gander, 2000<br><br>RoB: low    | CS              | Nights of work-related sleep<br>disturbance: self-reported<br>(continuous)<br><br>Assessed for the past 6<br>months                                                         | NR                                                                                               | Risk of fatigue-related errors:<br>questionnaire modelled after<br>Gravenstein et al., 1990<br><br>Assessed for the past 6<br>months                 | 1) Risk of fatigue-related errors increased with<br>increasing nights of work-related sleep<br>disturbance: RR: 1.25, 95% CI: 1.06-1.49.                                                                                                                                                                                                                                                                                                                                                                                                                                                                               |
| Saadat, 2017<br><br>RoB: low    | CS              | Sleep deprivation due to an<br>overnight call shift                                                                                                                         | NR                                                                                               | Reaction time: PVT<br><br>Assessed after an overnight<br>call shift and the morning of<br>a regular (non-call) day                                   | Mean (SD) reaction time was slower post-call<br>(297.76 (83.75)) vs. on a regular day (266.58<br>(38.35)), p=0.047.                                                                                                                                                                                                                                                                                                                                                                                                                                                                                                    |

| Study<br>Risk of Bias (RoB)      | Study<br>design | Exposures or intervention                                                                                                                                                                                                                                          |                                                                                                                                                                                                                                                                                                                                                                                                                                                     | Outcomes                                                                                                                                                                                |                                                                                                                                                                                                                                                                                                                                                                                                                                                                                                                                                                                                                                                                                                                                                                                                                                                                                       |
|----------------------------------|-----------------|--------------------------------------------------------------------------------------------------------------------------------------------------------------------------------------------------------------------------------------------------------------------|-----------------------------------------------------------------------------------------------------------------------------------------------------------------------------------------------------------------------------------------------------------------------------------------------------------------------------------------------------------------------------------------------------------------------------------------------------|-----------------------------------------------------------------------------------------------------------------------------------------------------------------------------------------|---------------------------------------------------------------------------------------------------------------------------------------------------------------------------------------------------------------------------------------------------------------------------------------------------------------------------------------------------------------------------------------------------------------------------------------------------------------------------------------------------------------------------------------------------------------------------------------------------------------------------------------------------------------------------------------------------------------------------------------------------------------------------------------------------------------------------------------------------------------------------------------|
|                                  |                 | Assessment measure and<br>time points                                                                                                                                                                                                                              | Baseline                                                                                                                                                                                                                                                                                                                                                                                                                                            | Assessment measure and<br>time points                                                                                                                                                   | Associations between exposure and outcome                                                                                                                                                                                                                                                                                                                                                                                                                                                                                                                                                                                                                                                                                                                                                                                                                                             |
| Gander, 2008<br><br>RoB: unclear | NC              | Sleep loss across<br>consecutive working days or<br>on-call work: Wrist-<br>mounted Actiwatch (Mini<br>Mitter, Bend, Oregon, US),<br>sleep and duty diary<br><br>Assessed over a 2-week<br>period including a weekend<br>of rostered shifts or on-call             | ≥2 hours sleep <baseline:<br>8% of 24-h periods that<br>included day work vs. 14%<br>that included day + call;<br>Sleep hours: mean 0.6h less<br>sleep when working day<br>shifts (p=0.014) and 0.8h<br>less sleep when working day<br>shifts + call (p=0.013) vs. off.                                                                                                                                                                             | Psychomotor performance:<br>PVT<br><br>Assessed within 2 hours pre-<br>and post-call                                                                                                    | 1) In fixed model analysis for reaction time<br>including sleep, time since waking, work hours:<br>acute sleep loss associated with slower median<br>reaction time, $F_{(1,184)}=5.70$ , $p<0.05$ ; longer time<br>since waking associated with poorer<br>performance on the slowest 10%, $F_{(1,185)}=5.13$ ,<br>$p<0.05$ ;<br>2) Reaction time across 12 consecutive work<br>days: no change in pre-duty reaction times but<br>post-duty reaction times slowed linearly,<br>median -3.38, $p<0.001$ ; decline in performance<br>across 10 minutes became progressively<br>steeper both pre- and post-duty, $p=0.020$ .                                                                                                                                                                                                                                                              |
| <b>ER or ICU physicians</b>      |                 |                                                                                                                                                                                                                                                                    |                                                                                                                                                                                                                                                                                                                                                                                                                                                     |                                                                                                                                                                                         |                                                                                                                                                                                                                                                                                                                                                                                                                                                                                                                                                                                                                                                                                                                                                                                                                                                                                       |
| Sanches, 2015<br><br>RoB: high   | CS              | Acute sleep deprivation<br>(<5h of night sleep after a<br>night shift of 12h)<br>Sleep hours: 7-day<br>Actigraphy via SenseWear®<br>Pro2 Armband;<br>Sleepiness: ESS;<br>Sleep quality: PSQI<br><br>Assessed the week and<br>night before the<br>psychomotor tests | Non-sleep deprived vs.<br>sleep deprived:<br><br>PSQI >5: 0% vs. 33%, ns;<br>ESS≥10: 11% vs. 67%<br>Sleep time (mean±SD) in<br>week before tests: duration<br>and number of naps higher<br>in sleep deprived group, but<br>diurnal sleep hours lower,<br>428.6±30.1 vs. 375.8±55.9,<br>$p=0.038$ ;<br>Sleep quality (mean±SD):<br>week before tests: 3.3±0.7<br>vs. 2.6±0.3, $p=0.013$ ;<br>night before tests: 3.1±0.8<br>vs. 1.9±1.0, $p=0.020$ . | Psychomotor performance<br>via Battery Test Reaction 5<br>(v1): StimulTest, InstrucTest,<br>MovemTest; TP test of visual<br>attention<br><br>Assessed on morning after<br>night shift 8 | Sleep deprived group vs. non-sleep deprived,<br>mean±SD:<br>1) InstrucTest: correct answers: 169.4 (16.0) vs.<br>148.3 (28.3), $p=0.070$ ; wrong answers: ns;<br>perfection index (%): 99.6 (0.3) vs. 98.9 (1.3),<br>$p=0.021$ ; response latency (sec/click): ns;<br>2) StimulTest: correct answers: 170.7 (21.9) vs.<br>145.1 (17.9), $p=0.022$ ; wrong answers: ns;<br>perfection index (%): ns; response latency<br>(sec/click): 1.06 (0.1) vs. 1.24 (0.1), $p=0.022$ ;<br>3) MovemTest: ns for any parameter;<br>4) TP: omitted symbols: 34.2±18.4 vs.<br>62.7±44.0, $p=0.034$ ; concentration index (%):<br>14.1±8.9 vs. 30.0±25.9, $p=0.019$ ; quality index<br>(%): 13.8±8.6 vs. 29.2±26.4, $p=0.031$ ;<br>correct/wrong symbols: ns;<br>Correlations between sleep and tests:<br>1) TP for sleep hours nights 1-6: omitted<br>symbols: $r=-0.686$ , $p=0.011$ for non-sleep- |

| Study<br>Risk of Bias (RoB)                       | Study<br>design | Exposures or intervention                                                                                                                                                                        |                                                                                                                                                                                                                                                                                                                                                      | Outcomes                                                                                                                                                                                                                                                                                                                                               | Associations between exposure and outcome                                                                                                                                                                                                                                                                                                          |
|---------------------------------------------------|-----------------|--------------------------------------------------------------------------------------------------------------------------------------------------------------------------------------------------|------------------------------------------------------------------------------------------------------------------------------------------------------------------------------------------------------------------------------------------------------------------------------------------------------------------------------------------------------|--------------------------------------------------------------------------------------------------------------------------------------------------------------------------------------------------------------------------------------------------------------------------------------------------------------------------------------------------------|----------------------------------------------------------------------------------------------------------------------------------------------------------------------------------------------------------------------------------------------------------------------------------------------------------------------------------------------------|
|                                                   |                 | Assessment measure and<br>time points                                                                                                                                                            | Baseline                                                                                                                                                                                                                                                                                                                                             | Assessment measure and<br>time points                                                                                                                                                                                                                                                                                                                  |                                                                                                                                                                                                                                                                                                                                                    |
|                                                   |                 |                                                                                                                                                                                                  |                                                                                                                                                                                                                                                                                                                                                      |                                                                                                                                                                                                                                                                                                                                                        | deprived, ns for sleep-deprived; concentration index (%): $r=-0.359$ , $p=0.037$ for sleep-deprived, ns for non-sleep deprived; $r=-0.359$ , $p=0.037$ for the group; no other significant correlations;<br>2) No correlation between PSQI, ESS and any of the psychomotor tests.                                                                  |
| <b>Generalists<sup>b</sup></b>                    |                 |                                                                                                                                                                                                  |                                                                                                                                                                                                                                                                                                                                                      |                                                                                                                                                                                                                                                                                                                                                        |                                                                                                                                                                                                                                                                                                                                                    |
| Harbeck, 2015                                     | CS              | 24-hours on-call shift with sleep disturbance: self-reported number of sleep disturbances and hours of sleep per night<br><br>Assessed before a normal day shift, and after a 24-h on call shift | 1) Sleep hours on a normal day vs. following a 24-h shift: <2 hours: 0 vs. 5.9%; 2-4 hours: 5.9% vs. 47.1%; 4-6 hours: 11.8% vs. 35.3%; >6 hours: 82.4% vs. 11.8%<br>2) Number of sleep disturbances a normal day vs. following a 24-h shift: 0: 82.4% vs. 11.8%; 1: 11.8% vs. 35.3%; 2: 5.9% vs. 47.1%; 3: 0% vs. 5.9%; 4: 0% vs. 0%; >4: 0% vs. 0% | Neurocognitive parameters: computerized attentional test (vigilance, alertness); D2 letter cancellation test (divided attention); Trail Making Test (visual attention, task switching); Digit Span, Digit Symbol Substitution Test, Weschler Memory Scale (memory functions)<br><br>Assessed before a normal day shift, and after a 24-h on call shift | Intrinsic alertness, focused attention and vigilance were similar on both occasions; Phasic alertness improved following the on-call shift: mean (SD) 24.8 (15.6) vs. 38.3 (21.5), $p = 0.022$ .                                                                                                                                                   |
| <b>Mixed specialties or undefined populations</b> |                 |                                                                                                                                                                                                  |                                                                                                                                                                                                                                                                                                                                                      |                                                                                                                                                                                                                                                                                                                                                        |                                                                                                                                                                                                                                                                                                                                                    |
| Chen, 2008                                        | CS              | Sleepiness: ESS score $\geq 11$                                                                                                                                                                  | Mean $\pm$ SD ESS score: 7.8 $\pm$ 4.0, range: 0-20, 23% had scores $\geq 11$ .                                                                                                                                                                                                                                                                      | Impact on work and personal life: Impact Questionnaire with a 5-point Likert scale from 1 (strongly agree) to 5 (strongly disagree)                                                                                                                                                                                                                    | 1) Impact score correlated with ESS, $r=0.31$ , $p<0.05$ ;<br>2) ESS score was higher among physicians who agree/strongly agree vs. other response: written an incorrect order: 8.8 vs. 7.3, $p=0.02$ ; might fall asleep while examining a patient: 13.2 vs. 7.7, $p=0.001$ ; look forward to sleeping at grand rounds: 10.4 vs. 7.4, $p=0.002$ ; |
| RoB: high                                         |                 | Time points NR                                                                                                                                                                                   |                                                                                                                                                                                                                                                                                                                                                      | Time points NR                                                                                                                                                                                                                                                                                                                                         |                                                                                                                                                                                                                                                                                                                                                    |

| Study<br>Risk of Bias (RoB)       | Study<br>design | Exposures or intervention                                                                                                                                                                                                       |                                                                                                                                                                     | Outcomes                                                                                                                          | Associations between exposure and outcome                                                                                                                                                                                                                                                                                                                                                                                                                                                                                                                                                                                                                               |
|-----------------------------------|-----------------|---------------------------------------------------------------------------------------------------------------------------------------------------------------------------------------------------------------------------------|---------------------------------------------------------------------------------------------------------------------------------------------------------------------|-----------------------------------------------------------------------------------------------------------------------------------|-------------------------------------------------------------------------------------------------------------------------------------------------------------------------------------------------------------------------------------------------------------------------------------------------------------------------------------------------------------------------------------------------------------------------------------------------------------------------------------------------------------------------------------------------------------------------------------------------------------------------------------------------------------------------|
|                                   |                 | Assessment measure and<br>time points                                                                                                                                                                                           | Baseline                                                                                                                                                            | Assessment measure and<br>time points                                                                                             |                                                                                                                                                                                                                                                                                                                                                                                                                                                                                                                                                                                                                                                                         |
|                                   |                 |                                                                                                                                                                                                                                 |                                                                                                                                                                     |                                                                                                                                   | <p>3) No difference in ESS score for those who agree/strongly agree vs. other response: work is unaffected by sleep loss and fatigue, thinking is unaffected by sleep loss, sleep loss and fatigue affect my medical decisions, have heard of others making medical errors due to sleep loss and fatigue, never make errors in prescriptions on post-call days, have made medical errors because of sleep loss and fatigue;</p> <p>4) Higher ESS scores predicted by impact score in multivariate regression including personal and work-related factors: <math>\beta=0.11</math>, <math>p=0.005</math>.</p>                                                            |
| Heponiemi, 2014<br><br>RoB: low   | CS              | <p>Sleeping problems: 4-item Jenkins Scale on 6-point scale from 1 (never) to 6 (every night)</p> <p>Assessed in 2006</p>                                                                                                       | <p>Mean<math>\pm</math>SD (range) score: 2.30<math>\pm</math>1.00 (1-6)</p>                                                                                         | <p>Work ability: Work Ability Index on scale from 1 (could not work at all) to 10 (best work ability)</p> <p>Assessed in 2010</p> | <p>1) On-call duty had an indirect effect on work ability (<math>R^2=0.11</math>, 95% CI: -0.122, -0.031, <math>p&lt;0.001</math>) through two mediators (work interference with family, sleeping problems);</p> <p>2) Sleeping problems inversely associated with work ability, <math>\beta=-0.29</math>, <math>p&lt;0.001</math>.</p>                                                                                                                                                                                                                                                                                                                                 |
| Kanieta, 2011<br><br>RoB: unclear | CS              | <p>Sleep hours: self-reported (continuous)</p> <p>Sleepiness and sleep difficulties: 5-point scale from 1 (never) to 5 (always);</p> <p>Insomnia: <math>\geq 3</math> sleep difficulties</p> <p>Assessed for the past month</p> | <p>Insufficient rest: 32.5%;</p> <p>Daytime sleepiness: 3.5%;</p> <p>Insomnia: 20.0%;</p> <p>Sleep time (mean<math>\pm</math>SD min): 279.8<math>\pm</math>60.9</p> | <p>Self-reported medical incidents: 4-point scale from 1 (never) to 4 (often)</p> <p>Assessed for the past month</p>              | <p>1) Prevalence of medical incidents (% (95% CI)): sleep deprived (26.8% (24.2, 29.4)) vs. not (15.2% (13.7, 16.7)), <math>p&lt;0.01</math>; insomnia (24.8% (21.6, 28.0)) insomnia vs. not (17.6% (16.2, 19.0)), <math>p&lt;0.01</math>; <math>\geq 6</math>h sleep (18.3% (16.8, 19.8)) vs. <math>&lt;6</math>h (21.7% (18.8, 24.6)), <math>p=0.03</math>;</p> <p>2) Predictors of medical incidents in multivariate model including personal and work-related factors (OR (95% CI)): lacking rest due to sleep deprivation vs. not (1.65 (1.33-2.04)), <math>p&lt;0.01</math>; insomnia vs. not (1.45 (1.16-1.82), <math>p&lt;0.01</math>); ns for sleep hours.</p> |

| Study<br>Risk of Bias (RoB)      | Study<br>design | Exposures or intervention                                                                                                                                       |          | Outcomes                                                                                                                                                                      |  | Associations between exposure and outcome                                                                                                                                                                                                                                              |
|----------------------------------|-----------------|-----------------------------------------------------------------------------------------------------------------------------------------------------------------|----------|-------------------------------------------------------------------------------------------------------------------------------------------------------------------------------|--|----------------------------------------------------------------------------------------------------------------------------------------------------------------------------------------------------------------------------------------------------------------------------------------|
|                                  |                 | Assessment measure and<br>time points                                                                                                                           | Baseline | Assessment measure and<br>time points                                                                                                                                         |  |                                                                                                                                                                                                                                                                                        |
| Sexton, 2001<br><br>RoB: high    | CS              | Fatigue as a factor<br>impacting performance<br><br>Time points NR                                                                                              | NR       | Performance effectiveness<br>measured by 1 question:<br>agree, neutral, disagree<br><br>Time points NR                                                                        |  | 1) "When fatigued, I perform effectively during<br>critical phases of operations/patient care":<br>Anesthetic: 47% agree; 15% neutral; 38%<br>disagree;<br>Surgical: 70% agree; 12% neutral; 18%<br>disagree.                                                                          |
| Shirom, 2006<br><br>RoB: low     | CS              | Tiredness and exhaustion:<br>SMBM Physician Fatigue<br>Subscale on a 7-point scale<br>from 1 (almost never) to 7<br>(always)<br><br>Time points NR              | NR       | Quality of care: Adapted 15-<br>item SERVQUAL with a 5-<br>point Likert scale from 1<br>(very small extent) to 5 (very<br>large extent)<br><br>Time points NR                 |  | 1) Quality of care positively predicted by<br>fatigue in a model incorporating several other<br>components of burnout, $\beta=0.17$ , $p<0.05$ .                                                                                                                                       |
| Smith, 2017<br><br>RoB: moderate | CS              | Sleep deprivation: self-<br>reported via open-ended<br>comments<br><br>Time points NR                                                                           | NR       | Perceived competence: self-<br>reported via open-ended<br>comments<br><br>Time points NR                                                                                      |  | Some physicians indicated that continual<br>tiredness and exhaustion led to concerns that<br>it would affect their competence; some felt<br>that professional performance was<br>compromised at times of physical and mental<br>fatigue.                                               |
| Tanti, 2017<br><br>RoB: high     | CS              | Fatigue: questionnaire on<br>contributors to prescribing<br>errors, with a 5-point Likert<br>scale (very high to very low<br>association)<br><br>Time points NR | NR       | Prescribing errors:<br>questionnaire on<br>contributors to prescribing<br>errors, with a 5-point Likert<br>scale (very high to very low<br>association)<br><br>Time points NR |  | Perception of the contribution of fatigue to<br>prescribing errors differed by physician type<br>( $p<0.05$ ): 34% of community doctors, 96%<br>hospital doctors, 8% of office-working doctors<br>perceived a very high or high association<br>between fatigue and prescribing errors. |

<sup>a</sup>Includes studies of anesthesiologists, where these were physicians.

<sup>b</sup>Includes primary care physicians, internal medicine physicians, and general practitioners.

ACC: aortic cross-clamp time; BA: before-after; CABG: cardiopulmonary bypass time; CCPT II: Connor's Continuous Performance Test II; CI: confidence interval; CO: cohort; CS: cross-sectional; ER: emergency; ESS: Epworth Sleepiness Scale; h: hour(s); HVL: Hopkin's Verbal Learning Task; Hz: Hertz; ICU: intensive care unit; IQR: interquartile range; KSS: Karolinska Sleep Scale; min: minutes; ms: millisecond(s); N-back: Dual N-back test; NA: not applicable; NR: not reported; ns: not statistically significant; OR: odds ratio; PSQI: Pittsburgh Sleep Quality Index; PVT: Psychomotor vigilance Performance Task; RR: risk ratio; RCT: randomized controlled trial; RoB: Risk of Bias; SD: standard deviation; SE: standard error; SERVQUAL: Service Quality Measure; SMBM: Shirom-Melamed Burnout Measure; TP: Toulouse-Piéron test; TS: time series; US: United States of America; vs.: versus

Patient outcomes related to fatigue or sleep restriction among physicians in independent practice

| Study              | Study  | Exposures                                                                                                                              | Outcome Measures                                                                                                         |                                                                                                                      | Associations between exposure and outcome                                                                                                                                                                                                                                                                                                                                                                                                    |
|--------------------|--------|----------------------------------------------------------------------------------------------------------------------------------------|--------------------------------------------------------------------------------------------------------------------------|----------------------------------------------------------------------------------------------------------------------|----------------------------------------------------------------------------------------------------------------------------------------------------------------------------------------------------------------------------------------------------------------------------------------------------------------------------------------------------------------------------------------------------------------------------------------------|
| Risk of Bias (RoB) | design | Intervention or assessment scale and time points                                                                                       | Baseline                                                                                                                 | Assessment scale and time points                                                                                     |                                                                                                                                                                                                                                                                                                                                                                                                                                              |
| Surgeons           |        |                                                                                                                                        |                                                                                                                          |                                                                                                                      |                                                                                                                                                                                                                                                                                                                                                                                                                                              |
| Chu, 2011          | CO     | Sleep deprivation: moderate (3-6 h) or severe (<3-h) sleep deprivation the night before surgery (self-reported hours)                  | Of 4,047 procedures, 83 (2.1%) performed by severely sleep-deprived, 1,595 (39.4%) by moderately sleep-deprived surgeons | Chart review: mortality, surgical complications, length of stay<br><br>Assessed during and post-surgery              | 1) 0-3 vs. 3-6 vs. >6 hours of sleep: No difference in incidence of mortality, incidence of 10 major complications (except septicemia, 3.6% vs. 0.9% vs. 0.8%, p=0.03), ICU length of stay; in-hospital length of stay (days): 7.0 vs. 6.0 vs. 7.0, p<0.001.                                                                                                                                                                                 |
| Ellman, 2004       | CO     | Sleep deprivation: performed a case starting 22:00 to 05:00, or ending 22:00 to 07:30 and performed a subsequent case in the next 24-h | Of 6,751 procedures, 339 (5%) were performed by sleep deprived surgeons                                                  | Chart review: mortality, surgical complications, length of stay<br><br>Assessed during and post-surgery              | 1) Sleep deprived vs. non-sleep deprived: no difference in mortality, need for blood products, complications (operative, neurologic, renal, infectious, pulmonary), in-hospital length of stay.                                                                                                                                                                                                                                              |
| Govindarajan, 2015 | CO     | Sleep deprivation: treated patients from midnight to 07:00 and performed a subsequent case on the same day                             | NR                                                                                                                       | Chart review: mortality, surgical complications, readmission, length of stay<br><br>Assessed during and post-surgery | 1) Sleep deprived vs. non-sleep deprived: no difference in mortality, surgical complications, readmissions within 30 days, or length of stay.                                                                                                                                                                                                                                                                                                |
| Rothschild, 2009   | CO     | Sleep deprivation: daytime procedures following an overnight procedure; Sleep opportunity: 0-6h, <6h                                   | NR                                                                                                                       | Chart review: frequency of adverse surgical complications<br><br>Assessed during and post-surgery                    | 1) Post-nighttime vs. control: no difference in number of procedures with complications, total number of complications, preventable complications, type of complications;<br>2) Operating room procedures with complications, OR (95% CI): 8.5% for 0-6h sleep vs. 3.1% for >6h sleep, 2.70 (1.13-6.48), p=0.03;<br>3) All procedures with complications, OR (95% CI): 6.2% for 0-6h sleep vs. 3.4% for >6h sleep, 1.72 (1.02-2.89), p=0.04. |

| Study<br>Risk of Bias (RoB)      | Study<br>design | Exposures                                                                                                     |                                                                                       | Outcome Measures                                                                                                                                    | Associations between exposure and outcome                                                                                                                                                                                                                                                                                               |
|----------------------------------|-----------------|---------------------------------------------------------------------------------------------------------------|---------------------------------------------------------------------------------------|-----------------------------------------------------------------------------------------------------------------------------------------------------|-----------------------------------------------------------------------------------------------------------------------------------------------------------------------------------------------------------------------------------------------------------------------------------------------------------------------------------------|
|                                  |                 | Intervention or assessment<br>scale and time points                                                           | Baseline                                                                              | Assessment scale and time<br>points                                                                                                                 |                                                                                                                                                                                                                                                                                                                                         |
| Schieman, 2007<br><br>RoB: low   | CO              | Fatigue: surgeon billed for<br>clinical work after 22:00 the<br>night before surgery                          | Of 270 procedures, 22<br>(8%) were performed by<br>fatigued surgeons                  | Chart review: surgical<br>complications, length of stay,<br>mortality, cancer recurrence<br><br>Assessed during and post-<br>surgery                | 1) Fatigued vs. non-fatigued surgeons: no<br>difference in intra- or post-operative<br>complication rate, length of stay, in-hospital<br>length of stay, cancer recurrence.                                                                                                                                                             |
| Vinden, 2014<br><br>RoB: low     | CO              | Sleep deprivation (at risk):<br>surgeon worked 00:00 to<br>07:00 and performed surgery<br>07:00 to 18:00      | Of 94,183 surgeries, 2,078 (2.2%) were<br>performed by surgeons<br>who were 'at risk' | Chart review: conversion to<br>open procedure (from<br>laparoscopic), iatrogenic<br>injuries, mortality<br><br>Assessed during and post-<br>surgery | 1) At risk vs. not at risk surgeon: no difference<br>in incidence of conversion to open procedure,<br>iatrogenic injuries, mortality, in either<br>univariate or multivariate analyses.                                                                                                                                                 |
| <b>Obstetricians</b>             |                 |                                                                                                               |                                                                                       |                                                                                                                                                     |                                                                                                                                                                                                                                                                                                                                         |
| Rothschild, 2009<br><br>RoB: low | CO              | Sleep deprivation: daytime<br>procedures following an<br>overnight procedure;<br>Sleep opportunity: 0-6h, <6h | NR                                                                                    | Chart review: frequency of<br>adverse obstetric complications<br><br>Assessed during and post-<br>delivery                                          | 1) Post-nighttime vs. control: no difference in<br>number of procedures with complications,<br>total complications, preventable<br>complications, type of complications;<br>2) No association between sleep deprivation<br>and proportion of procedures with<br>complications, nor difference for 0-6h vs. >6h<br>of sleep opportunity. |

CI: confidence interval; CO: cohort; h: hours; NR: not reported; OR: odds ratio; RoB: Risk of Bias; SD: standard deviation; US: United States of America; vs.: versus
